1 T cell responses induced by attenuated flavivirus vaccination are specific and show limited cross-  
2 reactivity with other flavivirus species.

3 Alba Grifoni<sup>a</sup>, Hannah Voic<sup>a</sup>, Sandeep Kumar Dhanda<sup>a</sup>, Conner K. Kidd<sup>a</sup>, James D Brien<sup>b</sup>, Søren  
4 Buus<sup>c</sup>, Anette Stryhn<sup>c</sup>, Anna P Durbin<sup>d</sup>, Stephen Whitehead<sup>e</sup>, Sean A. Diehl<sup>f</sup>, Aruna D. De Silva<sup>a,g</sup>,  
5 Angel Balmaseda<sup>h</sup>, Eva Harris<sup>i</sup>, Daniela Weiskopf<sup>a</sup> and Alessandro Sette<sup>a,j,#</sup>

6 <sup>a</sup>Division of Vaccine Discovery, La Jolla Institute for Immunology, La Jolla, CA, United States

7 <sup>b</sup>Saint Louis University, Saint Louis, MO, United States

8 <sup>c</sup>Laboratory of Experimental Immunology, Faculty of Health Sciences, University of Copenhagen,  
9 Copenhagen, Denmark.

10 <sup>d</sup>Johns Hopkins University Bloomberg School of Public Health, Baltimore, MD

11 <sup>e</sup>National Institute of Allergy and Infectious Diseases, National Institutes of Health, Bethesda, MD

12 <sup>f</sup>University of Vermont, School of Medicine, Burlington, VT

13 <sup>g</sup>Department of Paraclinical Sciences, General Sir John Kotelawala Defense University,  
14 Ratmalana, Sri Lanka.

15 <sup>h</sup>National Virology Laboratory, National Center for Diagnosis and Reference, Ministry of Health,  
16 Managua, Nicaragua

17 <sup>i</sup>Division of Infectious Diseases and Vaccinology, School of Public Health, University of  
18 California, Berkeley, CA 94720.

19 <sup>j</sup>Department of Medicine, University of California San Diego, La Jolla, CA, United States

20

21 **Running Head: Human T cell cross-reactivity in flavivirus species**

22 **#Address correspondence to Dr. Alessandro Sette; alex@lji.org.**

23 **Keywords: T cells, Flaviviruses, vaccines, DENV, YFV**

24 **Abstract word count: 247**

25 **Manuscript word count: 6692**

26 **Abstract**

27 Members of the flavivirus genus share a high level of sequence similarity and often circulate in  
28 the same geographical regions. However, whether T cells induced by one viral species cross-  
29 react with other related flaviviruses has not been globally addressed. Here, we tested pools of  
30 epitopes derived from dengue (DENV), zika (ZIKV), Japanese Encephalitis (JEV), West Nile  
31 (WNV), and yellow fever (YFV) viruses by Intracellular Cytokine Staining (ICS) using PBMCs  
32 of individuals naturally exposed to DENV or immunized with DENV (TV005) or YF17D  
33 vaccines. CD8 T cell responses recognized epitopes from multiple flaviviruses, however, the  
34 magnitude of cross-reactive responses was consistently several-fold lower than those to the  
35 autologous epitope pools, and associated with lower expression of activation markers such as  
36 CD40L, CD69, and CD137. Next, we characterized the antigen sensitivity of short-term T cell  
37 lines (TCL) representing twenty-nine different individual epitope/donor combinations. TCL  
38 derived from DENV monovalent vaccinees induced CD8 and CD4 T cells that cross-reacted  
39 within the DENV serocomplex but were consistently associated with more than 100-fold lower  
40 antigen sensitivity for most other flaviviruses, with no cross-recognition of YFV derived  
41 peptides. CD8 and CD4 TCL from YF17D vaccinees were associated with very limited cross-  
42 reactivity with any other flaviviruses, and in five out of eight cases more than 1000-fold lower  
43 antigen sensitivity. Overall, our data suggest limited cross-reactivity for both CD4 and CD8 T  
44 cell responses between flaviviruses and has implications for understanding immunity elicited by  
45 natural infection, and strategies to develop live attenuated vaccines against flaviviral species.

46 **Importance**

47 The envelope (E) protein is the dominant target of neutralizing antibodies for dengue virus  
48 (DENV) and yellow fever virus (YFV). Accordingly, several DENV vaccine constructs use the E  
49 protein in a live attenuated vaccine format, utilizing a backbone derived from a heterologous  
50 flavivirus (such as YF) as a delivery vector. This backbone comprises the non-structural (NS)  
51 and capsid (C) antigens which are dominant targets of T cell responses. Here, we demonstrate  
52 that cross-reactivity at the level of T cell responses amongst different flaviviruses is very limited,  
53 despite high levels of sequence homology. Thus, the use of heterologous flavivirus species as a  
54 live attenuated vaccine vector is not likely to generate optimal T cell responses, and might thus  
55 impair vaccine performance.

## 56 **Introduction**

57           Flavivirus infections can cause a wide variety of clinical manifestations and complications  
58 in humans, ranging from undifferentiated fever, vascular leak syndrome, encephalitis and death.  
59 Because of their high prevalence worldwide, the four serotypes of dengue virus (DENV), yellow  
60 fever virus (YFV), West Nile virus (WNV), Japanese encephalitis virus (JEV), and most recently  
61 Zika virus (ZIKV), are responsible for tens of millions of disease cases and thus have a large global  
62 impact on human health and disease (4, 21).

63           Despite intense investigation, the immune correlates of disease and vaccine efficacy are  
64 not well defined, particularly in the case of DENV and ZIKV (25). Both antibody and T cell  
65 responses have been reported to play a role in immunity and immunopathology (19, 24, 32, 42, 46,  
66 50, 53). Of particular interest in this context are the potential contribution of flavivirus cross-  
67 reactive antibodies and T cell responses to both disease protection and immunopathogenesis.

68           The envelope (E) protein, a major virion surface protein, is involved in receptor binding  
69 and membrane fusion and induces neutralizing antibodies in the infected hosts. Human infection  
70 results in the production of both virus species-specific and flavivirus cross-reactive antibodies (39).  
71 In the case of DENV, most individuals generate cross-reactive antibodies that initially protect  
72 against the spread of infection, but may later enhance infection and/or disease with heterologous  
73 serotypes (24, 25). Similarly, cross-neutralization in acute ZIKV infection in donors with pre-  
74 existing DENV immunity was the strongest in early convalescence but waned to low levels over  
75 time (31). JEV vaccination-induced high levels of JEV neutralizing antibodies but also DENV  
76 cross-reactive antibodies, which at sub-neutralizing levels, possessed DENV infection-  
77 enhancement activity (38).

78           At the level of T cell reactivity, a similar pattern has been reported, with clear cross-  
79 reactivity within different DENV serotypes. It has been proposed that cross-reactive T cells raised  
80 against the original infecting serotype dominate during a secondary heterologous infection, a  
81 phenomenon that has been termed “original antigenic sin” (20, 29). It was hypothesized that during  
82 secondary infection, expansion of pre-existing, lower avidity, and cross-reactive memory T cells  
83 may induce a “cytokine storm” contributing to immunopathogenesis (29). In contrast with this  
84 initial theory, several lines of evidence suggest that both CD4 and CD8 T cells are involved in  
85 resolving DENV infection. It has been demonstrated that both CD4 and CD8 T cells can have a  
86 direct role in protection against DENV challenge in a murine model (63, 64) and strong,  
87 multifunctional, T cell responses correlated with alleles associated with protection from severe  
88 disease in humans naturally exposed to DENV (1, 9, 45, 53, 56). These data implied a protective  
89 role for T cells against severe DENV disease (50). Similarly, it has been demonstrated that T cell  
90 immunity to ZIKV and DENV induced responses that are cross-reactive with other flaviviruses in  
91 both humans (15) and HLA transgenic mice(36).

92           Vaccines for JEV and YFV, but not for WNV or ZIKV(28) are currently licensed for use  
93 in humans, and are based on live attenuated vaccine (LAV) platforms. A DENV LAV, based on  
94 a chimeric DENV/YFV, was recently licensed but significant controversy remains over its safety  
95 and efficacy (16, 43). While all licensed vaccines rely on serological markers as immune correlates  
96 measured with validated assays (25), the potential role of T cell-mediated immunity is not yet fully  
97 understood. This is relevant since a general hallmark of LAVs is their ability to induce both  
98 humoral and cellular immune memory. We previously defined in the DENV context, the antigens  
99 recognized as immunodominant by both CD8 and CD4 responses (11, 50, 51, 54). Non-structural  
100 (NS) proteins NS3, NS4B and NS5 were the dominant antigens for CD8 T cell responses, while

101 for CD4 T cell responses, the capsid (C), together with NS2A, NS3, and NS5 were  
102 immunodominant (51).

103 Over the past few years, several full-length live-attenuated vaccines containing antigens  
104 from all four DENV serotypes (tetravalent vaccines) have been developed. The National Institute  
105 of Allergy and Infectious Diseases has developed the live attenuated dengue vaccines  
106 TV003/TV005 containing attenuated DENV1, 3 and DENV4 viruses plus a chimeric DENV2/4  
107 virus (60) while Takeda's live-attenuated tetravalent dengue vaccine candidate (TAK-3) is  
108 comprised of an attenuated DENV-2 strain plus chimeric viruses containing the prM and E genes  
109 of DENV-1, -3 and -4 cloned into the attenuated DENV2 backbone (33). Thus, both vaccines  
110 would be expected to elicit cellular immunity cross-reactive amongst different serotypes. In fact,  
111 T cell responses following tetravalent vaccination with TV005 are focused on the highly conserved  
112 NS proteins (49). Likewise, it has been reported that TAK-003, which is based on a DENV-2 NS  
113 backbone, induces significant cross-reactive responses against NS proteins of DENV-1, -3 and -4  
114 (48).

115 The most advanced vaccine against dengue virus, Dengvaxia, was recently licensed, and is  
116 based on chimeric viruses containing the prM and E genes of DENV-1, -2, -3 and -4 cloned into  
117 the attenuated YF backbone (18). This vaccine has been associated with lower efficacy as well as  
118 safety issues (43). In the case of the Dengvaxia vaccine, CD8 cellular immunity will have to rely  
119 on YF/DENV T-cell cross-reactivity, since the NS proteins encoded in the vaccine are derived  
120 from YFV and not DENV. A potential decreased or compromised cellular immunity might be a  
121 potential factor contributing to the lower efficacy. Thus, it is of interest to address to what extent  
122 DENV and YFV responses induced by vaccination are cross-reactive.

123 Here, we characterize immune responses elicited by the TV005 and YF17D vaccines to  
124 identify and define the functional attributes of cross-reactive responses at the single epitope level  
125 between different flaviviruses. The majority of TV005 induced CD4 and CD8 T cells recognize  
126 the DENV serocomplex, while the YF17D vaccine-induced fewer cross-reactive T cells.  
127 Characterization of the extent and functionality of CD4 and CD8 T cell cross-reaction across  
128 different flaviviruses will contribute to the understanding of immunity in natural infections, and  
129 has particular implications for vaccine efficacy and safety in endemic settings.

130

## 131 **Results**

### 132 **Sequence homology of CD8 epitope pools representative of five prevalent flavivirus species**

133 To address to what extent T cells induced by live attenuated DENV or YF vaccines cross-  
134 react with other flaviviruses, we developed pools of several hundred predicted or experimentally  
135 defined CD8 epitopes from five prevalent flaviviruses (DENV, ZIKV, YFV, WNV and JEV). The  
136 process used to define each of these epitope MegaPools (composed of 9-mers and 10-mers),  
137 referred hereafter as MPs, is described in more detail in the materials and methods section. As  
138 shown in **Table 1** each MP contained an average of 316 peptides, (ranging from 268-368 peptides  
139 /pool) derived from all the ten proteins (C, M/E and NS1-5).

140 **Table 2**, lists the number of epitopes for each MP that shared 70% or more sequence  
141 identity with DENV, ZIKV, YFV, WNV and JEV consensus sequences, respectively (62). As  
142 expected, based on varying degrees of homology between the different viruses, the number of  
143 conserved epitopes was highest between DENV and ZIKV, and between WNV and JEV. None of  
144 the epitopes included in the various MP shared 70% or more sequence identity with control viral

145 sequences derived from the Ebola virus (EBOV), Chikungunya virus (CHIKV) and Hepatitis C  
146 virus (HCV).

147

### 148 **Measuring CD8 T cell responses in flavivirus-endemic areas**

149 Addressing the extent of T cell cross-reactivity amongst several flaviviruses is important  
150 to understand the potential impact of exposure to multiple subsequent flaviviruses in endemic  
151 areas. To address this point, our overall approach was to assess the ability of heterologous  
152 flavivirus MPs to elicit the production of IFN $\gamma$  from memory CD8<sup>+</sup> T cell responses in samples  
153 from Nicaragua and Sri Lanka. To determine whether DENV specific T cell responses might be  
154 cross-reactive with other flavivirus epitopes, we studied peripheral blood mononuclear cell  
155 (PBMC) samples from blood bank donors in Managua (n=8) and Colombo (n=6) previously  
156 selected to be DENV seropositive and being categorized as high responders against the DENV MP  
157 (The high responders were defined by a stimulation Index >2 and background reactivity below 0.1,  
158 see Methods). **Fig. 1** shows the reactivity against all five MPs expressed as the percentage of  
159 CD3<sup>+</sup>CD8<sup>+</sup> IFN $\gamma$ -producing cells. As expected due to the selection criteria of those donors,  
160 significantly high reactivity was observed after DENV MP stimulation with a geometric mean  
161 response of 0.24 (p=0.0001 when compared to the same unstimulated cells as control (CTRL) with  
162 paired non-parametric Wilcoxon test). In addition, significant reactivity in DENV MP-reactive  
163 donors was observed to ZIKV, YFV, WNV and JEV MPs, with geometric mean in the 0.056 to  
164 0.074 range (p values as compared to control were 0.048 for ZIKV, 0.013 for YFV, 0.037 for  
165 WNV and 0.046 for JEV). These results demonstrated that five heterologous MPs recalled a  
166 significant response in DENV MP-reactive subjects when compared to an unstimulated control  
167 (CTRL).



168 To determine the extent of cross-reactivity, we next compared the magnitude of the  
169 homologous responses elicited by the DENV MP in DENV-reactive donors with the heterologous  
170 responses elicited by the ZIKV, YFV, JEV and WNV MPs and found that the heterologous MP  
171 responses were significantly lower in magnitude than the homologous MP responses (p values  
172 ranging from 0.0005-0.0479).

173 To confirm that the results observed were indeed flavivirus-specific, we also assessed T  
174 cell reactivity in this cohort against a non-flavivirus CMV/EBV MP. We found a significant T cell  
175 response when comparing the CMV/EBV MP to the unstimulated control (geometric mean of the  
176 response of 0.42 and p-value of 0.0005) but no significant difference in terms of T cell reactivity  
177 when it was compared to the DENV MP (p=0.4697).

178 These results are compatible with the notion that DENV reactive CD8 T cells responses  
179 might recognize certain cross-reactive epitopes contained in the other MPs, although to a  
180 significantly lower extent, in terms of magnitude of response as the geometric mean percentage of  
181 CD3+CD8+IFN $\gamma$ + in each heterologous flavivirus MP is 4 to 5 fold less than the one observed  
182 after DENV MP stimulation. As some of these samples were collected in Sri Lanka, an endemic  
183 area where other flaviviruses are circulating, it cannot be excluded that some of the response  
184 detected was due to exposure to the other flaviviruses. Whether this was indeed the case could not  
185 be addressed in the Sri Lanka samples as they were derived from buffy coats from normal blood  
186 donations and thus neither clinical history details nor serum samples were available. In Nicaragua,  
187 however, these PBMCs were collected before the introduction of ZIKV, and no YFV, WNV or  
188 JEV is known to be circulating; additionally, there is no YFV vaccination of the general public.  
189 Thus, previous exposure to other flaviviruses is highly unlikely in the Nicaraguan samples.

190 **Cross-reactivity pattern of CD8 T cell responses induced by a tetravalent dengue vaccine**  
191 **(TV005)**

192 To address potential cross-reactive responses in a controlled exposure setting, and exclude  
193 the possibility that previous unknown flavivirus exposure influence the results observed we  
194 utilized a cohort of US donors who were vaccinated with experimental tetravalent dengue live  
195 attenuated vaccine (TDLAV) candidates TV005, 6-12 months prior to blood collection. All of  
196 these donors were confirmed flavivirus naïve before vaccine administration (26).

197 Specifically, we tested the CD8 T cell IFN $\gamma$  reactivity against all five flavivirus pools  
198 (DENV, ZIKV, YFV, WNV and JEV) in PBMCs derived from TDLAV vaccinated and  
199 unvaccinated flavivirus naïve control donors (**Fig 2A**). As expected, no reactivity to either MP was  
200 observed in the case of the unvaccinated controls (no significant differences between DENV MP  
201 and CTRL groups). Also as expected, the strongest reactivity was detected in the case of TDLAV  
202 vaccinees against the DENV MP, with a 0.22 geometric mean response of CD8 T cells producing  
203 IFN $\gamma$  ( $p=0.0001$  compared to the unstimulated control by paired non-parametric Wilcoxon test,  
204 and  $p<0.0001$ , when compared to the DENV MP-stimulated unvaccinated group with unpaired  
205 non-parametric Mann Whitney test).

206 Statistically significant but weak responses in TDLAV vaccinee samples were detected  
207 against ZIKV, YFV and JEV MPs, with geometric mean values in the 0.045 to 0.063 range ( $p$   
208 values as compared to either the CTRL or the flavivirus-naïve donors were 0.0007 and 0.0088  
209 respectively for ZIKV, 0.0014 and 0.004 for YFV, 0.0002 and 0.005 for JEV) in the case of the  
210 TDLAV vaccinees. In the case of the WNV MP, the responses were not significantly higher than  
211 the control ( $p=0.058$ ), and significantly lower than the DENV MP ( $p=0.016$ ). Finally, the non-  
212 flavivirus MP (CMV/EBV) responses were higher than the control, but as expected did not differ

213 between the vaccinated and unvaccinated group (p values 0.0008 and 0.81). Based on these results  
214 we conclude that TDLAV vaccination induced CD8 responses that are also capable of recognizing  
215 ZIKV, YFV and JEV epitopes.

216 We next examined the level of cross-reactive responses in terms of magnitude. In all cases,  
217 cross-reactive responses in TDLAV vaccinee samples were significantly lower (4.6-fold lower on  
218 average compared to DENV MP stimulation; p-values 0.0004, 0.0012, 0.002, and 0.0001 for the  
219 ZIKV, YFV JEV and WNV MPs, respectively). Thus, we conclude that TDLAV vaccination  
220 induces CD8 responses that are also capable of recognizing ZIKV, YFV and JEV epitopes but to  
221 a significantly lower extent (**Fig. 2A**).

222

### 223 **Flavivirus cross-reactive CD8 T cell responses induced by the yellow fever vaccine (17D)**

224 We next asked whether a similar pattern of cross-reactivity might be detectable after  
225 vaccination with a different attenuated flavivirus vaccine. Accordingly, we tested the CD8 T IFN $\gamma$   
226 reactivity against all five flavivirus pools in PBMCs isolated from US donors 6-12 months after  
227 vaccination with the live attenuated yellow fever vaccine (YFLAV, YF-17D) and unvaccinated  
228 US controls. (**Fig. 2B**).

229 As expected, little to no reactivity to the YFV MP was observed in the case of the  
230 unvaccinated controls (no difference between YFV MP and CTRL groups). By contrast, and also  
231 as expected, the strongest reactivity was detected against the YFV MP, with a geometric mean of  
232 0.122 (p<0.0001, when compared to the unstimulated control (CTRL), and p= 0.0002 when  
233 compared to the YFV MP-stimulated unvaccinated group).

234 Responses were noted also in the case of the YFLAV vaccinees (as compared to either the  
235 control or the flavivirus-naïve donors) when stimulated with the DENV MP (p value= 0.0003 and

236 0.0016, respectively). Some responses were also noted in the case of the ZIKV, WNV and JEV  
237 MPs, with median values in the 0.027 to 0.049 range. These responses were, in general, significant  
238 when compared to CTRL, but not significant when compared to unvaccinated donors (ZIKV: p-  
239 values 0.0461 and 0.3446, WNV: p-values 0.0001 and 0.3168, JEV: p-values <0.0001 and 0.1473,  
240 respectively). Finally, as previously stated, no significant difference between YFLAV vaccinees  
241 and flavivirus-naïve controls were observed in the case of a control MP encompassing epitopes  
242 derived from the non-flavivirus CMV/EBV viruses (p-values 0.0046 and 0.3352). Based on these  
243 results we conclude that YFLAV vaccination induces CD8 responses that are capable of  
244 recognizing DENV epitopes, but only marginally if at all ZIKV, WNV and JEV epitopes.

245 We next compared the magnitude of the YFV MP responses in YFLAV recipients, with  
246 those observed in response to the DENV, ZIKV, WNV and JEV MPs. In all cases, responses  
247 against DENV, ZIKV, WNV and JEV MPs were significantly lower (3.4-fold lower on average  
248 compared to YFV MP; p-values <0.0001, 0.0006, 0.0001 and 0.0012 for the ZIKV, DENV, WNV  
249 and JEV MPs, respectively). We conclude that YFLAV vaccination is able to induce cross-reactive  
250 CD8 T cell responses recognizing epitopes derived from other flaviviruses, but the magnitude of  
251 such cross-reactive responses is significantly lower compared to homologous YFV-derived  
252 epitopes (**Fig. 2B**).

253

## 254 **CD8 T cell cross-recognition of heterologous epitopes is associated with lower expression of** 255 **activation markers**

256 The results above suggest that heterologous cross-reactive responses are in general weaker  
257 when compared to the homologous induced responses when stimulated with peptides variants. We  
258 next investigated whether, in addition to the difference in magnitude, we could observe differences

259 in the quality of CD8-specific T cell responses, as represented by activation markers. For this  
260 purpose, we analyzed the intracellular expression of CD40L, CD69 and CD137 activation markers  
261 in virus-specific CD8 T cells (CD3+CD8+IFN $\gamma$ +) after stimulation with the various MPs (see **Fig.**  
262 **8** for gating strategy). The percentage of total CD8 T cells expressing the CD40L, CD69 and  
263 CD137 markers (**Fig. 3**, white bars) were compared with the percentage of expression in  
264 CD3+CD8+IFN $\gamma$ + T cells after DENV CD8 MP stimulation (**Fig. 3**, black bars) or after  
265 stimulation with other flavivirus MPs (**Fig. 3**, grey bars).

266 For TDLAV (TV005) vaccinees, CD69, CD137 and CD40L markers were significantly  
267 upregulated in the T cells responding to DENV MP stimulation as compared to the bulk population  
268 (CD69: DENV [median = 42%] vs bulk [6%]  $p < 0.0001$ , CD137 DENV [32%] vs bulk [5%]  
269  $p = 0.0057$ , CD40L: DENV [11%] vs bulk [0.6%],  $p = 0.0008$ , Mann-Whitney test). We then  
270 compared the expression of these markers on CD3+CD8+IFN $\gamma$ + T cells from TDLAV (TV005)  
271 vaccinees in response to DENV-specific and heterologous MP stimulation. A significant lower  
272 expression of CD69 was detected after stimulation with DENV MP vs other flavivirus MPs, ( $p =$   
273  $0.0344$ ) and a non-significant trend was observed for CD40L (DENV-specific vs other flavivirus  
274 MPs =  $0.0575$ ) and for CD137 (DENV-specific vs other flavivirus MPs =  $0.1033$ ) (**Fig. 3A**).

275 Similarly, YFV-specific homologous stimulation of YFLAV (YF17D) vaccinees was  
276 associated with significantly increased expression of CD69, CD137 and CD40L markers as  
277 compared to the bulk population (CD69: YFV [73%] vs bulk [0.1%],  $p < 0.0001$ , CD137:  
278 YFV [28%] vs bulk [4%],  $p < 0.0001$ , CD40L: YFV [8%] vs bulk [0.1%],  $p < 0.0001$ , Mann-Whitney  
279 test; **Fig. 3B**). When we examined the CD3+CD8+IFN $\gamma$ + T cell response of YFLAV (YF17D)  
280 vaccinees to the other heterologous MPs, we found significantly lower expression for the CD69  
281 and CD137 markers (YFV-specific vs other flavivirus MPs  $p = 0.0006$  and  $0.0038$ , respectively),

282 while a non- significant trend was observed for CD40L (YFV-specific vs other flavivirus MPs p=  
283 0.1784) (**Fig. 3B**). Overall, these data suggest that CD8 T cells that recognize cross-reactive  
284 heterologous sequences receive less vigorous activation signals, particularly after YFLAV  
285 monovalent vaccination.

286

### 287 **Monovalent DLAV vaccination induces CD8 T cell cross-reactivity against other DENV** 288 **serotypes but is limited against other flaviviruses**

289 The data presented above suggest that DENV or YFV vaccination induces responses that  
290 are only marginally cross-reactive with other flavivirus species in terms of both magnitude and  
291 activation capacity. These data were obtained utilizing epitope MPs containing hundreds of  
292 different peptides. To characterize the phenomenon by a different approach, we analyzed  
293 responses against representative individual epitopes. For this purpose, we derived epitope-specific  
294 short-term T Cell Lines (TCLs) by stimulating PBMCs for 14 days with the homologous peptide.  
295 Their antigen sensitivity was quantified by determining dose-response curves. In parallel, we  
296 determined the reactivity of these TCLs to peptides corresponding to the homologous epitope in  
297 parallel to their sensitivity to heterologous corresponding sequences derived from the other  
298 flaviviruses studied herein. Comparing the dose-response of the homologous epitope with the  
299 heterologous peptides from the various flaviviruses allowed for the quantification of relative  
300 potencies.

301 We first determined the level of cross-reactivity in six different TCLs from four  
302 monovalent DLAV vaccinees (immunized with either DEN1Δ30 and DEN3Δ30,31). To ensure  
303 that the epitopes studied were representative of *in vivo* vaccination, we selected PBMCs and  
304 epitopes from donors that we had previously screened in *ex vivo* IFN-γ ELISPOT assays, following

305 vaccination with specific monovalent DLAV vaccines (49). The homologous, as well as  
306 heterologous peptides corresponding to the other three DENV serotypes and YFV, ZIKV, JEV and  
307 WNV sequences, were tested at six concentrations to assess the relative potency (**Fig. 4 A-F**). As  
308 expected in all cases, responses to the homologous peptides were the most dominant. If responses  
309 to any of the heterologous peptides were detected, we calculated the fold difference in antigen  
310 sensitivity as compared to the homologous peptide.

311         Of 42 heterologous peptides tested, high cross-reactivity (defined as reactivity within 10-  
312 fold of the homologous peptide) was detected in seven of them (17% of the total). No instance of  
313 cross-reactivity was detected in the high and moderate potency range (1-100 fold lower response  
314 than to homologous peptide), while in four heterologous peptides (10% of the total) reactivity in  
315 the low potency range (101-1000-fold lower response than to homologous peptides) was detected.  
316 Finally, seven heterologous peptides (17 % of the total), were associated with very low potency  
317 (1001-10000-fold lower response than to homologous peptides) and 24 heterologous peptides  
318 (57%) were negative, defined as a more than a 10000-fold lower potency. DENV1 and DENV4  
319 sequences were cross-recognized in the highest number of instances, followed by DENV2.  
320 DENV3 showed the weakest relative potency range across all the DENV serotypes. Cross-reactive  
321 responses against heterologous ZIKV, JEV and WNV peptides were detected in one peptide each,  
322 although with low relative potency (101-1000 fold range), and in all remaining instances, no cross-  
323 reactivity was detected. Heterologous YFV peptides did not stimulate cross-reactive T cell  
324 responses in all the instances analyzed. From the summary data in **Fig. 4G**, we conclude that, while  
325 a degree of cross-reactivity between different DENV serotypes was detected, cross-reactivity with  
326 other flaviviruses was limited or, in the case of YFV, totally absent.

327

328 **YFV vaccination induces minimal CD8 T cell cross-reactivity against other flaviviruses.**

329 To generalize and expand these findings, we performed similar experiments utilizing  
330 PBMCs from donors vaccinated with the YF17D vaccine, and epitopes previously identified in *ex*  
331 *vivo* IFN- $\gamma$  ELISPOT assays, in the context of an epitope identification study (Weiskopf et al,  
332 unpublished data). As described above, PBMCs were expanded with YFV-specific epitopes for 14  
333 days. The homologous and heterologous peptides were assayed over a 100,000-fold dose range to  
334 assess their relative potency. **Fig. 5A-H** shows results from eight different TCLs derived from six  
335 different YF17D vaccinees. For one TCL shown in **Fig. 5C**, cross-reactive responses were detected  
336 against all heterologous flavivirus sequences. In this case, the percent of sequence homology  
337 between all peptides tested was 90% or more. For the TCLs shown in **Fig. 5B** and **5H**, cross-  
338 reactivity with other flaviviruses sequences such as JEV and WNV and DENV2 were detected.

339 Of the 56 heterologous peptides tested, high cross-reactivity (defined as reactivity within a  
340 10-fold of the response induced by the homologous peptide) was detected in ten heterologous  
341 peptides (18% of the total). Cross-reactivity in the 10.1-100 fold moderate relative potency range  
342 was detected in two heterologous peptides (4% of the total), and only one heterologous peptide  
343 was found in the lowest 101 to 1000 fold and 1001-10000 relative potency range (2% of the total  
344 in both cases). No cross-reactivity was detected for 42 of the heterologous peptides, corresponding  
345 to 75% of the total (**Fig. 5J**). In conclusion, CD8 T cells induced by the YF17D vaccine showed  
346 minimal cross-reactivity against other flaviviruses with the DENV serocomplex being the least  
347 cross-recognized flavivirus.

348

349 **Vaccine-induced CD4 T cell cross-reactivity is even more limited than CD8**



350           Since live attenuated vaccines induce both CD8 and CD4 T cell responses, we asked next  
351 whether we could detect cross-reactivity between flaviviruses at the level of CD4 T cell responses.  
352 Following the same strategy described above, we expanded DLAV- and YFV- specific CD4 T cell  
353 lines for 14 days and tested homologous and heterologous sequences to assess relative potency.  
354 We derived six different TCL from two monovalent DENV vaccinees (DEN1Δ30 and  
355 DEN3Δ30,31) representing three epitopes recognized in each of the two vaccinees (**Fig. 6A-F**).  
356 Of the 45 heterologous peptides tested, high cross-reactivity (defined as reactivity within 10-fold  
357 of the homologous peptide) was detected only in two heterologous peptides (4% of the total). More  
358 limited cross-reactivity in the moderate 10.1-100 fold lower potency range was detected in four  
359 heterologous peptides (9% of the total), and two heterologous peptides in the low 101 to 1000 fold  
360 range (4% of the total). Finally, the majority of heterologous peptides (32 out of 45, 71% of the  
361 total) were in the very low 1001-10000 lower relative potency range and no cross-reactivity was  
362 detected for 5 of the heterologous peptides, corresponding to 11% of the total (**Fig. 6G**). In  
363 conclusion, an even lower apparent degree of cross-reactivity between different DENV serotypes  
364 was detected within the CD4 compartment compared to the CD8 compartment and the cross-  
365 reactivity with other flaviviruses was very limited for both CD4 and CD8 T cells.

366           Next, we derived TCLs derived from seven different YF17D vaccinees (**Fig. 7A-I**). In  
367 seven of the 63 heterologous peptides considered (12% of the total), high cross-reactivity in the 1-  
368 10 fold range was observed, all to be ascribed to a single peptide sharing the amino acid core  
369 GLYGNG across the different flavivirus species (**Fig. 7E**). Three additional heterologous peptides  
370 (0.5% of the total) showed a minimal level of cross-reactivity, all corresponding to the  
371 heterologous WNV sequence with relative potency levels within the 1001-10000 range, while the  
372 vast majority of the heterologous peptides (82% of the total) did not show any cross-reactivity.

373 Overall, these data demonstrate limited CD4 cross-reactivity against other flaviviruses after  
374 YF17D vaccination. In conclusion, our data demonstrate that while vaccination with monovalent  
375 DLAV vaccines induced some CD8 and CD4 T cells cross-reactivity, mostly against the other  
376 DENV serotypes, the T cell cross-reactivity induced by the YF17D vaccine was limited and mostly  
377 absent.

378

## 379 **Discussion**

380 Flaviviruses such as DENV, ZIKV, JEV, WNV and YFV are highly homologous to each  
381 other and often circulate in the same geographical regions. The cross-reactivity is expected to be  
382 more pronounced in the case of the TV005 vaccine since in this case it was shown that TV005  
383 focuses the responses on conserved (and thereby by definition cross-reactive) epitopes. Here we  
384 studied the level of cross-reactivity of T cells induced by natural infection and vaccination with  
385 live attenuated flavivirus vaccines. We demonstrate that broad cross-reactivity amongst sequences  
386 of different flaviviruses exists and is largely associated with the recognition of sequences derived  
387 from different DENV serotypes. Cross-reactivity amongst different flavivirus species was limited  
388 and was associated with responses of lower frequency and magnitude. It was further found that T  
389 cells activated from cross-reactive sequences displayed lower levels of expression of common  
390 activation markers, and not increased cytokine secretion.

391 One limitation of this study is that the overall ex-vivo cross-reactive responses were measured  
392 after stimulation to selected predicted epitopes MPs. We can not exclude that we missed potential  
393 cross-reactive epitopes by mostly including bioinformatically defined epitopes. However, this  
394 does not affect the findings at the single epitope level where we tested the cross-reactive potential  
395 of experimentally defined epitopes.

396 These data provide further insights regarding what level of sequence homology is generally  
397 associated with potential cross-reactivity.

398 The data has implications for understanding immunity elicited by vaccination and/or natural  
399 infection. In particular, it suggests that the use of YFV as a backbone to engineer live vaccines to  
400 deliver E and prM proteins from other flavivirus is not likely to generate optimal T cell responses  
401 against other flaviviruses.

402 The cross-reactivity between DENV- and YFV- derived epitopes observed was fairly  
403 limited. The absence of the NS and C DENV proteins, which are immunodominant for CD4 and  
404 CD8 responses in Dengvaxia (17), combined with the limited cross-reactivity observed in this  
405 study, might contribute to the relatively low level of efficacy observed for this vaccine. This is in  
406 agreement with a murine model of heterologous flavivirus infection where previous exposure to  
407 YF did not provide cross-reactive functional protection against the DENV1 challenge (39).

408 Traditionally, flaviviruses have been subdivided into so-called sero-complexes, comprising  
409 members that are cross-neutralized by polyclonal sera. This classification largely correlates with  
410 the amino acid sequence identity of E and led to the establishment of the DENV sero-complex  
411 (consisting of DENV serotypes 1 to 4), and the JEV sero-complex (also including WNV)(22). Zika  
412 virus is more closely related to DENV than to the JE virus sero-complex or to YFV which is almost  
413 as distantly related to the other mosquito-borne flaviviruses as it is to the tick-borne viruses (22).  
414 In accordance with this general overall level of sequence homology, we have observed the highest  
415 cross-reactivity within the DENV sero-complex after monovalent DENV vaccination. Thus, while  
416 T cell cross-reactivity is appreciable across different sero-complexes/serotypes, T cell cross-  
417 reactivity is limited across different flavivirus species.

418 T cells recognize peptide epitopes derived from the original priming antigen and/or vaccine  
419 and are reactivated in subsequent encounters with the same exact epitopes, but also from closely  
420 related epitopes. The concept of original antigenic sin, originally described for antibody responses  
421 in influenza (23) implies that the pathogen strain shapes subsequent responses to other influenza  
422 strains. In the case of DENV, the concept of original sin was postulated to contribute to  
423 immunopathology (30, 37), but later studies showed that while previous exposure to different  
424 DENV serotypes influenced the repertoire of responding T cells, both in humans (15, 52) and mice  
425 (57), the effect was mostly reflected in increases in cross-reactive T cells recognizing conserved  
426 epitopes, and cross-reactive T cells were associated with protection in murine models of DENV  
427 infection (9, 59). Consistent with this notion, we have previously shown that the simultaneous  
428 administration of all four monovalent DENV vaccine strains leads to the induction of highly  
429 conserved sequences against all four DENV serotypes (49).

430 While heterologous sequences were generally associated with incomplete cross-reactivity in this  
431 study, this does not rule out a contribution of cross-reactive responses in influencing disease and  
432 vaccination outcomes. Indeed, in a murine model of DENV infection it has been shown that  
433 despite being associated with lower magnitude responses, cross-reactive CD8 T cell epitopes can  
434 still contribute to protection by lowering the viral titer in DENV-infected mice (9, 50, 63, 64). We  
435 have also shown that DENV pre-exposure influences T cell responses against the highly  
436 homologous ZIKV in both human and murine systems (15, 58).

437 In our studies, not only the degree of cross-reactive recognition of sequences derived from  
438 other flaviviruses was limited, but also the T cell activation induced by the cross-reactive species  
439 was suboptimal, resulting in lower expression of several activation markers. This is consistent with  
440 the original description by Evavold et al (10) of the phenomenon of Altered Peptide Ligands

441 (APL), epitope variants carrying one or more substitutions. A large body of literature suggests that  
442 APL can trigger incomplete T cell activation, and clarified some of the mechanism involves in the  
443 effect, as ascribed to lower levels of Zap70 phosphorylation and other TCR signaling alterations  
444 (41). Thus, it seems that epitope variants in some cases are fully cross-reactive, while in other  
445 cases are incompletely activated. We saw no evidence of increased cytokine production as  
446 suggested by other studies hypothesizing a cytokine storm induced by heterologous sequences as  
447 a mechanism of DENV pathogenesis (30, 37).

448 Our data also provides insights regarding what degree of sequence homology is necessary  
449 for cross-reactivity, at the level of CD4 and CD8 T cell responses. Specifically, CD8 T cell cross-  
450 reactivity was detected in 9 out of 9 instances of heterologous sequences that had one substitution  
451 (about 90 % of sequence identity for 9/10-mers) as compared to the immunizing epitope. Cross-  
452 reactivity was detected in 6 out of 9 instances of heterologous sequences that had two substitutions  
453 (about 80 % of sequence identity for 9/10-mers). Cross-reactivity was detected in 5 out of 15  
454 heterologous sequences that had three substitutions (about 70 % of sequence identity for 9/10  
455 mers). Finally, cross-reactivity was detected in only 5 out of 61 instances of heterologous  
456 sequences that had four or more substitution (less than 67 % of sequence identity). Thus, 80 % of  
457 cross-reactive responses were associated with 67% or more sequence identity.

458 This is in agreement with our previous results, where we found that CD8 T cell cross-  
459 reactivity was typically detected for heterologous epitopes that shared 70% or higher sequence  
460 (52) and substitution of 1-2 amino acids marked the threshold for CD8 epitopes (Weiskopf JI  
461 2011). In contrast, in the case of CD4 responses, no clear pattern could be discerned, with peptides  
462 sharing as little as 50% sequence identity being associated with high cross-reactivity. While the  
463 molecular mechanism of this difference is not addressed by the current study, this might be related

464 to the fact that in the case of CD4 responses, each antigenic 15mer epitope might bind in several  
465 different registers, and as result, the degree of homology of the central core region recognized by  
466 the CD4 response might be higher than what is recorded for the overall peptide.

467 In conclusion, the result of this study emphasizes the need to accurately assess T cell  
468 responses and the potential to cross-react with related pathogens in the context of vaccine  
469 development and also suggest that when vaccine vectors with significant homology to the vaccine  
470 target are used, anti-vaccine vector responses should also be evaluated.

471 **Material and Methods**

472 **Epitope MegaPool (MP) design and homology analyses**

473 Epitope CD8 MP was produced by sequential lyophilization of flavivirus-specific epitopes  
474 as we previously described and in particular, the DENV CD8 MP has been previously generated  
475 and validated in DENV exposed individuals derived from different geographical areas (3, 55).

476 Flavivirus-specific described epitopes were retrieved by querying the Immune Epitope  
477 Database (IEDB)(47) utilizing the following search parameters “positive assay only, No B cell  
478 assays, No MHC ligand assay, Host: Homo Sapiens and MHC restriction class I”. In the case of  
479 ZIKV, YFV, JEV and WNV, experimentally defined epitopes were supplemented by the predicted  
480 epitopes using TepiTool (34) algorithm. For this purpose, consensus sequences for Zika (ZIKV),  
481 Yellow Fever (YFV), Japanese encephalitis (JEV) and West Nile (WNV) viruses were generated  
482 from a multiple sequence alignment of all available strains (taxonomic IDs:64320, 11089, 11072,  
483 and 11084) and then blasted to identify the most representative viral isolate per each flavivirus, as  
484 we previously described (62).

485 In the case of YFV, analyses also included the YF17D vaccine strain and a virus isolate  
486 deriving from the recent outbreak in Brazil (protein ID: ARM37843.1) (2).

487 To perform the epitope prediction, a previously described (35) of 27 most frequent A and  
488 B alleles was considered, and predictions were performed for both 9-mers and 10-mers with a  
489 consensus percentile rank cutoff  $\leq 1.5$ . A subsequent HLA allele-specific filter was applied based  
490 on the percentile cutoff based on our studies performed on DENV infection (50, 55). When the  
491 HLA allele considered was not available, the median of the known alleles was used (as summarized  
492 in **Table 3**).

493           The resulting peptides have been then clustered using the IEDB cluster 2.0 tool and  
494 applying the IEDB recommended method (i.e. cluster-break method) with a 70% cut off for  
495 sequence identity (5, 6). Peptides were synthesized as crude material (A&A, San Diego, CA),  
496 resuspended in DMSO, pooled according to each flavivirus MP composition and finally  
497 sequentially lyophilized (3).

498           Homology analyses to dissect the homology level between each MP and the viral consensus  
499 sequences have been performed using the Immunobrowser tool (7). For each MP, the fraction of  
500 peptides with a sequence identity of  $\geq 70\%$  with each flavivirus consensus sequence was calculated.  
501 In the context of DENV CD8 MP, homology analyses were carried out in each DENV consensus  
502 sequences calculated per serotype, then the maximum value of homology obtained across the four  
503 serotypes was used for each peptide analyzed.

504

#### 505 **Study subjects.**

506           PBMCs from DENV endemic areas derived from healthy adult blood bank donors were  
507 collected anonymously from National Blood Center, Ministry of Health, Colombo, Sri Lanka, and  
508 from the Nicaraguan National Blood Center, Managua, as previously described (12).

509           In Nicaragua, samples were collected in the 2015-2016 range, prior to the introduction of  
510 ZIKV into the Americas. All protocols were approved by the institutional review boards of both  
511 LJI and Medical Faculty, the University of California, Berkeley, the Nicaraguan Ministry of  
512 Health, and the University of Colombo (serving as NIH approved IRB for Genetech). Blood  
513 collection and processing was performed in the two cohorts as we previously described(12, 14).

514           The yellow fever live-attenuated vaccine (YF17D) cohort and the flavivirus naïve cohorts  
515 consist of healthy donors; adult male and non-pregnant female volunteers, 18 to 50 years of age,



516 that were enrolled and either vaccinated with YF17D (n=15) or not (flavivirus naïve cohort; n=10)  
517 under the LJI program VD-101.

518 PBMC deriving from flavivirus naïve and YF17D cohorts were processed in LJI by  
519 density-gradient sedimentation using Ficoll-Paque (Lymphoprep; Nycomed Pharma, Oslo,  
520 Norway). Isolated PBMC were cryopreserved in heat-inactivated fetal bovine serum (FBS;  
521 HyClone Laboratories, Logan UT), containing 10% dimethyl sulfoxide (DMSO) (Gibco) and  
522 stored in liquid nitrogen until use in the assays.

523 The dengue fever live-attenuated vaccinees (TV005) consists of healthy donors, vaccinated  
524 with one or four of the dengue live attenuated viruses (DEN1 $\Delta$ 30, DENV4 $\Delta$ 30, DEN3 $\Delta$ 30/31 and  
525 DEN2/4 $\Delta$ 30), as previously reported (8, 26, 27, 61). Clinical trials for those vaccinations are  
526 described at Clinicaltrials.gov under numbers NCT01084291, NCT01073306, NCT00831012,  
527 NCT00473135, NCT00920517, NCT00831012, and NCT01072786.

528 Both vaccinees cohorts were analyzed 6 to 12 months after the initial vaccination.

529

### 530 **Flow Cytometry**

531 Cells were cultured in the presence of either DENV, YFV, ZIKV, JEV, or WNV MPs (1  
532  $\mu$ g/mL) or DMSO (0.1%) as negative control together with Brefeldin A (BD GolgiPlug, BD  
533 Biosciences) for 6 hours. After stimulation, cells were stained with surface markers for 30 min at  
534 4°C followed by fixation with 4% paraformaldehyde (Sigma-Aldrich, St. Louis, MO) at 4°C for  
535 10 min. Intracellular staining was incubated at RT for 30 min after cells permeabilization with  
536 saponin, as previously described (13, 44). Detailed information on all the antibodies used for flow  
537 cytometry experiments in this study can be found in **Table 4**.

538 Surface marker proteins and intracellular cytokine responses were quantified via flow cytometry  
539 (LSRII, BD Biosciences) and analyzed using FlowJo software version 10.5.3 (TreeStar Inc.,  
540 Ashland, OR). The gating strategy is schematically represented in **Fig 8**. Within the CD3+CD8+  
541 subset of lymphocytes, the differences in the magnitude of response between MP stimuli was  
542 assessed based on IFN $\gamma$ + frequency of parent percentage. The quality of the response was  
543 investigated comparing the intracellular staining of CD40L, CD69, CD137 markers within the  
544 entire CD8 population and within the CD8+IFN $\gamma$ + subsets using background-subtracted values  
545 and a 0.03 cut-off for positivity for the different stimuli.

546

#### 547 **ELISPOT assays on short term T cell lines (TCL) to quantitate the antigen dose responses**

548 Short term cell lines for 14 days were set up using donors previously vaccinated with  
549 monovalent DENV or YFV vaccines. Cells were expanded using specific DENV epitopes  
550 corresponding to the original vaccination and identified in previous studies (49). YFV epitopes  
551 were identified using the same approach in YFLAV donors. Cells were expanded using specific  
552 DENV/YFV epitopes corresponding to the original vaccination identified using the same approach  
553 as previously described (28). After 14 days, IFN $\gamma$  ELISPOT assays were performed as previously  
554 described (12, 50, 51). Briefly, each TCL was tested with the epitope derived from the immunizing  
555 vaccine, and peptides corresponding to analogous sequences from the different DENV serotypes  
556 or other flaviviruses (YFV, ZIKV, JEV, WNV) in triplicate. Each peptide was tested at six  
557 different concentrations (10 $\mu$ g/mL, 1 $\mu$ g/mL, 0.1 $\mu$ g/mL, 0.01 $\mu$ g/mL, 0.001 $\mu$ g/mL or  
558 0.0001 $\mu$ g/mL). Cells were stimulated for 20hr at 37 C°, 5% CO<sub>2</sub> at a concentration of 1x10<sup>5</sup>  
559 cells/mL media on plates previously coated with anti-human IFN $\gamma$  (Mab 1-D1K; Mabtech,  
560 Stockholm, Sweden). Cells were then discarded and plates were further incubated with

561 biotinylated IFN $\gamma$  antibody (Mab 7-B6-1; Mabtech, Stockholm, Sweden) and incubated for 2hr at  
562 37 C°. Avidin Peroxidase Complex (Vectastain ABC Kit, Vector Laboratories, Burlingame, CA)  
563 and 3'-amino-9-ethyl carbazole (AEC Tablets, Sigma, St. Louis, MO) were further used to develop  
564 the plate. Image analysis was performed using a KS-ELISPOT reader (Zeiss, Munich, Germany).

565

## 566 **Statistics**

567 Statistical analyses were performed using Graph pad Prism (San Diego, CA). Specifically,  
568 the analysis of the responses for different cohorts against the same stimuli was performed using  
569 unpaired, non-parametric Mann-Whitney test. While to compare the same cohort's response to  
570 different stimuli, a paired, non-parametric, Wilcoxon test was used. The relative potency analyses  
571 were performed by determine the dose-response to each homologous peptide required to achieve  
572 a level of response that is comparable to the dose-response of the immunizing epitope and calculate  
573 the corresponding fold difference in terms of antigen sensitivity determined by measuring the shift  
574 in dose-response observed in the x-axis, as previously described (40).

575 **Acknowledgments**

576 This work was supported by the National Institutes of Health contracts Nr.  
577 HHSN272200900042C and HHSN27220140045C to A.S, 75N9301900065 to A.S and D.W as  
578 well as P01AI106695 to E.H. Additional support was provided by HHSN272200900045C to SB.  
579 The TV003/005 clinical trials were funded by contract HHSN272200900010C of the Intramural  
580 Research Program of the NIH, NIAID. AG, HV and CK performed experiments, reviewed data,  
581 and planned the experimental strategy. SKD and SB performed and assisted in the bioinformatics  
582 analyses. APD, SW, SAD, JDB, EH, AnS and ADDS provided samples and sample information.  
583 AG, DW and AS conceived and directed the study, and wrote the manuscript. All authors have  
584 critically read and edited the manuscript.

585 **References**

- 586 1. **Angelo, M. A., A. Grifoni, P. H. O'Rourke, J. Sidney, S. Paul, B. Peters, A. D. de Silva,**  
587 **E. Phillips, S. Mallal, S. A. Diehl, B. D. Kirkpatrick, S. S. Whitehead, A. P. Durbin,**  
588 **A. Sette, and D. Weiskopf.** 2017. Human CD4(+) T Cell Responses to an Attenuated  
589 Tetravalent Dengue Vaccine Parallel Those Induced by Natural Infection in Magnitude,  
590 HLA Restriction, and Antigen Specificity. *J Virol* **91**.
- 591 2. **Bonaldo, M. C., M. M. Gomez, A. A. Dos Santos, F. V. S. Abreu, A. Ferreira-de-Brito,**  
592 **R. M. Miranda, M. G. Castro, and R. Lourenco-de-Oliveira.** 2017. Genome analysis of  
593 yellow fever virus of the ongoing outbreak in Brazil reveals polymorphisms. *Memorias do*  
594 *Instituto Oswaldo Cruz* **112**:447-451.
- 595 3. **Carrasco Pro, S., J. Sidney, S. Paul, C. Lindestam Arlehamn, D. Weiskopf, B. Peters,**  
596 **and A. Sette.** 2015. Automatic Generation of Validated Specific Epitope Sets. *Journal of*  
597 *immunology research* **2015**:763461.
- 598 4. **Daep, C. A., J. L. Munoz-Jordan, and E. A. Eugenin.** 2014. Flaviviruses, an expanding  
599 threat in public health: focus on dengue, West Nile, and Japanese encephalitis virus. *J*  
600 *Neurovirol* **20**:539-560.
- 601 5. **Dhanda, S. K., S. Mahajan, S. Paul, Z. Yan, H. Kim, M. C. Jespersen, V. Jurtz, M.**  
602 **Andreatta, J. A. Greenbaum, P. Marcatili, A. Sette, M. Nielsen, and B. Peters.** 2019.  
603 IEDB-AR: immune epitope database-analysis resource in 2019. *Nucleic Acids Res*  
604 **47**:W502-W506.
- 605 6. **Dhanda, S. K., K. Vaughan, V. Schulten, A. Grifoni, D. Weiskopf, J. Sidney, B. Peters,**  
606 **and A. Sette.** 2018. Development of a novel clustering tool for linear peptide sequences.  
607 *Immunology*.

- 608 7. **Dhanda, S. K., R. Vita, B. Ha, A. Grifoni, B. Peters, and A. Sette.** 2018.  
609 ImmunomeBrowser: A tool to aggregate and visualize complex and heterogeneous  
610 epitopes in reference protein. *Bioinformatics*.
- 611 8. **Durbin, A. P., B. D. Kirkpatrick, K. K. Pierce, D. Elwood, C. J. Larsson, J. C. Lindow,**  
612 **C. Tibery, B. P. Sabundayo, D. Shaffer, K. R. Talaat, N. A. Hynes, K. Wanionek, M.**  
613 **P. Carmolli, C. J. Luke, B. R. Murphy, K. Subbarao, and S. S. Whitehead.** 2013. A  
614 single dose of any of four different live attenuated tetravalent dengue vaccines is safe and  
615 immunogenic in flavivirus-naive adults: a randomized, double-blind clinical trial. *J Infect*  
616 *Dis* **207**:957-965.
- 617 9. **Elong Ngonu, A., H. W. Chen, W. W. Tang, Y. Joo, K. King, D. Weiskopf, J. Sidney,**  
618 **A. Sette, and S. Shresta.** 2016. Protective Role of Cross-Reactive CD8 T Cells Against  
619 Dengue Virus Infection. *EBioMedicine* **13**:284-293.
- 620 10. **Evavold, B. D., and P. M. Allen.** 1991. Separation of IL-4 production from Th cell  
621 proliferation by an altered T cell receptor ligand. *Science* **252**:1308-1310.
- 622 11. **Grifoni, A., M. A. Angelo, B. Lopez, P. H. O'Rourke, J. Sidney, C. Cerpas, A.**  
623 **Balmaseda, C. G. T. Silveira, A. Maestri, P. R. Costa, A. P. Durbin, S. A. Diehl, E.**  
624 **Phillips, S. Mallal, A. D. De Silva, G. Nchinda, C. Nkenfou, M. H. Collins, A. M. de**  
625 **Silva, M. Q. Lim, P. A. Macary, F. Tatullo, T. Solomon, V. Satchidanandam, A. Desai,**  
626 **V. Ravi, J. Coloma, L. Turtle, L. Rivino, E. G. Kallas, B. Peters, E. Harris, A. Sette,**  
627 **and D. Weiskopf.** 2017. Global Assessment of Dengue Virus-Specific CD4(+) T Cell  
628 Responses in Dengue-Endemic Areas. *Front Immunol* **8**:1309.
- 629 12. **Grifoni, A., M. A. Angelo, B. Lopez, P. H. O'Rourke, J. Sidney, C. Cerpas, A.**  
630 **Balmaseda, C. G. T. Silveira, A. Maestri, P. R. Costa, A. P. Durbin, S. A. Diehl, E.**

- 631 **Phillips, S. Mallal, A. D. De Silva, G. Nchinda, C. Nkenfou, M. H. Collins, A. M. de**  
632 **Silva, M. Q. Lim, P. A. Macary, F. Tatullo, T. Solomon, V. Satchidanandam, A. Desai,**  
633 **V. Ravi, J. Coloma, L. Turtle, L. Rivino, E. G. Kallas, B. Peters, E. Harris, A. Sette,**  
634 **and D. Weiskopf.** 2017. Global Assessment of Dengue Virus-Specific CD4+ T Cell  
635 Responses in Dengue-Endemic Areas. *Front Immunol* **8**:1309.
- 636 13. **Grifoni, A., P. Costa-Ramos, J. Pham, Y. Tian, S. L. Rosales, G. Seumois, J. Sidney,**  
637 **A. D. de Silva, L. Premkumar, M. H. Collins, M. Stone, P. J. Norris, C. M. E. Romero,**  
638 **A. Durbin, M. J. Ricciardi, J. E. Ledgerwood, A. M. de Silva, M. Busch, B. Peters, P.**  
639 **Vijayanand, E. Harris, A. K. Falconar, E. Kallas, D. Weiskopf, and A. Sette.** 2018.  
640 Cutting Edge: Transcriptional Profiling Reveals Multifunctional and Cytotoxic Antiviral  
641 Responses of Zika Virus-Specific CD8(+) T Cells. *J Immunol* **201**:3487-3491.
- 642 14. **Grifoni, A., E. Moore, H. Voic, J. Sidney, E. Phillips, R. Jadi, S. Mallal, A. D. De Silva,**  
643 **A. M. De Silva, B. Peters, D. Weiskopf, and A. Sette.** 2019. Characterization of  
644 Magnitude and Antigen Specificity of HLA-DP, DQ, and DRB3/4/5 Restricted DENV-  
645 Specific CD4+ T Cell Responses. *Front. Immunol.*
- 646 15. **Grifoni, A., J. Pham, J. Sidney, P. H. O'Rourke, S. Paul, B. Peters, S. R. Martini, A.**  
647 **D. de Silva, M. J. Ricciardi, D. M. Magnani, C. G. T. Silveira, A. Maestri, P. R. Costa,**  
648 **L. M. de-Oliveira-Pinto, E. L. de Azeredo, P. V. Damasco, E. Phillips, S. Mallal, A.**  
649 **M. de Silva, M. Collins, A. Durbin, S. A. Diehl, C. Cerpas, A. Balmaseda, G. Kuan, J.**  
650 **Coloma, E. Harris, J. E. Crowe, Jr., M. Stone, P. J. Norris, M. Busch, H. Vivanco-**  
651 **Cid, J. Cox, B. S. Graham, J. E. Ledgerwood, L. Turtle, T. Solomon, E. G. Kallas, D.**  
652 **I. Watkins, D. Weiskopf, and A. Sette.** 2017. Prior Dengue virus exposure shapes T cell  
653 immunity to Zika virus in humans. *J Virol.*

- 654 16. **Gubler, D. J., and S. B. Halstead.** 2019. Is Dengvaxia a useful vaccine for dengue  
655 endemic areas? *BMJ* **367**:15710.
- 656 17. **Guy, B., B. Barrere, C. Malinowski, M. Saville, R. Teysou, and J. Lang.** 2011. From  
657 research to phase III: preclinical, industrial and clinical development of the Sanofi Pasteur  
658 tetravalent dengue vaccine. *Vaccine* **29**:7229-7241.
- 659 18. **Guy, B., M. Saville, and J. Lang.** 2010. Development of Sanofi Pasteur tetravalent dengue  
660 vaccine. *Human vaccines* **6**.
- 661 19. **Halstead, S. B.** 2014. Dengue Antibody-Dependent Enhancement: Knowns and  
662 Unknowns. *Microbiol Spectr* **2**.
- 663 20. **Halstead, S. B., S. Rojanasuphot, and N. Sangkawibha.** 1983. Original antigenic sin in  
664 dengue. *Am J Trop Med Hyg* **32**:154-156.
- 665 21. **Hassert, M., J. D. Brien, and A. K. Pinto.** 2019. Mouse Models of Heterologous  
666 Flavivirus Immunity: A Role for Cross-Reactive T Cells. *Front Immunol* **10**:1045.
- 667 22. **Heinz, F. X., and K. Stiasny.** 2017. The Antigenic Structure of Zika Virus and Its Relation  
668 to Other Flaviviruses: Implications for Infection and Immunoprophylaxis. *Microbiol Mol*  
669 *Biol Rev* **81**.
- 670 23. **Henry, C., A. E. Palm, F. Krammer, and P. C. Wilson.** 2018. From Original Antigenic  
671 Sin to the Universal Influenza Virus Vaccine. *Trends Immunol* **39**:70-79.
- 672 24. **Katzelnick, L. C., L. Gresh, M. E. Halloran, J. C. Mercado, G. Kuan, A. Gordon, A.**  
673 **Balmaseda, and E. Harris.** 2017. Antibody-dependent enhancement of severe dengue  
674 disease in humans. *Science* **358**:929-932.



- 675 25. **Katzelnick, L. C., E. Harris, and P. Participants in the Summit on Dengue Immune**  
676 **Correlates of.** 2017. Immune correlates of protection for dengue: State of the art and  
677 research agenda. *Vaccine* **35**:4659-4669.
- 678 26. **Kirkpatrick, B. D., A. P. Durbin, K. K. Pierce, M. P. Carmolli, C. M. Tibery, P. L.**  
679 **Grier, N. Hynes, S. A. Diehl, D. Elwood, A. P. Jarvis, B. P. Sabundayo, C. E. Lyon, C.**  
680 **J. Larsson, M. Jo, J. M. Lovchik, C. J. Luke, M. C. Walsh, E. A. Fraser, K. Subbarao,**  
681 **and S. S. Whitehead.** 2015. Robust and Balanced Immune Responses to All 4 Dengue  
682 Virus Serotypes Following Administration of a Single Dose of a Live Attenuated  
683 Tetravalent Dengue Vaccine to Healthy, Flavivirus-Naive Adults. *J Infect Dis* **212**:702-  
684 710.
- 685 27. **Kirkpatrick, B. D., S. S. Whitehead, K. K. Pierce, C. M. Tibery, P. L. Grier, N. A.**  
686 **Hynes, C. J. Larsson, B. P. Sabundayo, K. R. Talaat, A. Janiak, M. P. Carmolli, C. J.**  
687 **Luke, S. A. Diehl, and A. P. Durbin.** 2016. The live attenuated dengue vaccine TV003  
688 elicits complete protection against dengue in a human challenge model. *Sci Transl Med*  
689 **8**:330ra336.
- 690 28. **Li, G., C. Teleki, and T. Wang.** 2018. Memory T Cells in Flavivirus Vaccination.  
691 *Vaccines (Basel)* **6**.
- 692 29. **Mongkolsapaya, J., W. Dejnirattisai, X. N. Xu, S. Vasanawathana, N.**  
693 **Tangthawornchaikul, A. Chairunsri, S. Sawasdivorn, T. Duangchinda, T. Dong, S.**  
694 **Rowland-Jones, P. T. Yenchitsomanus, A. McMichael, P. Malasit, and G. Screaton.**  
695 2003. Original antigenic sin and apoptosis in the pathogenesis of dengue hemorrhagic  
696 fever. *Nature medicine* **9**:921-927.

- 697 30. **Mongkolsapaya, J., T. Duangchinda, W. Dejnirattisai, S. Vasanawathana, P.**  
698 **Avirutnan, A. Jairungsri, N. Khemnu, N. Tangthawornchaikul, P. Chotiyarnwong,**  
699 **K. Sae-Jang, M. Koch, Y. Jones, A. McMichael, X. Xu, P. Malasit, and G. Screaton.**  
700 2006. T cell responses in dengue hemorrhagic fever: are cross-reactive T cells suboptimal?  
701 *J Immunol* **176**:3821-3829.
- 702 31. **Montoya, M., M. Collins, W. Dejnirattisai, L. C. Katzelnick, H. Puerta-Guardo, R.**  
703 **Jadi, S. Schildhauer, P. Supasa, S. Vasanawathana, P. Malasit, J. Mongkolsapaya, A.**  
704 **D. de Silva, H. Tissera, A. Balmaseda, G. Screaton, A. M. de Silva, and E. Harris.**  
705 2018. Longitudinal Analysis of Antibody Cross-neutralization Following Zika Virus and  
706 Dengue Virus Infection in Asia and the Americas. *J Infect Dis* **218**:536-545.
- 707 32. **Nivarthi, U. K., N. Kose, G. Sapparapu, D. Widman, E. Gallichotte, J. M. Pfaff, B. J.**  
708 **Doranz, D. Weiskopf, A. Sette, A. P. Durbin, S. S. Whitehead, R. Baric, J. E. Crowe,**  
709 **Jr., and A. M. de Silva.** 2017. Mapping the Human Memory B Cell and Serum  
710 Neutralizing Antibody Responses to Dengue Virus Serotype 4 Infection and Vaccination.  
711 *J Virol* **91**.
- 712 33. **Osorio, J. E., D. Wallace, and D. T. Stinchcomb.** 2016. A recombinant, chimeric  
713 tetravalent dengue vaccine candidate based on a dengue virus serotype 2 backbone. *Expert*  
714 *Rev Vaccines* **15**:497-508.
- 715 34. **Paul, S., J. Sidney, A. Sette, and B. Peters.** 2016. TepiTool: A Pipeline for Computational  
716 Prediction of T Cell Epitope Candidates. *Curr Protoc Immunol* **114**:18 19 11-18 19 24.
- 717 35. **Paul, S., D. Weiskopf, M. A. Angelo, J. Sidney, B. Peters, and A. Sette.** 2013. HLA  
718 class I alleles are associated with peptide-binding repertoires of different size, affinity, and  
719 immunogenicity. *J Immunol* **191**:5831-5839.

- 720 36. **Reynolds, C. J., O. M. Suleyman, A. M. Ortega-Prieto, J. K. Skelton, P. Bonnesoeur,**  
721 **A. Blohm, V. Carregaro, J. S. Silva, E. A. James, B. Maillere, M. Dorner, R. J. Boyton,**  
722 **and D. M. Altmann.** 2018. T cell immunity to Zika virus targets immunodominant  
723 epitopes that show cross-reactivity with other Flaviviruses. *Scientific reports* **8**:672.
- 724 37. **Rothman, A. L.** 2011. Immunity to dengue virus: a tale of original antigenic sin and  
725 tropical cytokine storms. *Nat Rev Immunol* **11**:532-543.
- 726 38. **Saito, Y., M. L. Moi, N. Takeshita, C. K. Lim, H. Shiba, K. Hosono, M. Saijo, I.**  
727 **Kurane, and T. Takasaki.** 2016. Japanese encephalitis vaccine-facilitated dengue virus  
728 infection-enhancement antibody in adults. *BMC Infect Dis* **16**:578.
- 729 39. **Saron, W. A. A., A. P. S. Rathore, L. Ting, E. E. Ooi, J. Low, S. N. Abraham, and A.**  
730 **L. St John.** 2018. Flavivirus serocomplex cross-reactive immunity is protective by  
731 activating heterologous memory CD4 T cells. *Science advances* **4**:eaar4297.
- 732 40. **Sette, A., L. Adorini, E. Marubini, and G. Doria.** 1986. A microcomputer program for  
733 probit analysis of interleukin-2 (IL-2) titration data. *J Immunol Methods* **86**:265-277.
- 734 41. **Sloan-Lancaster, J., and P. M. Allen.** 1996. Altered peptide ligand-induced partial T cell  
735 activation: molecular mechanisms and role in T cell biology. *Annu Rev Immunol* **14**:1-27.
- 736 42. **Swanstrom, J. A., U. K. Nivarthi, B. Patel, M. J. Delacruz, B. Yount, D. G. Widman,**  
737 **A. P. Durbin, S. S. Whitehead, A. M. De Silva, and R. S. Baric.** 2019. Beyond  
738 Neutralizing Antibody Levels: The Epitope Specificity of Antibodies Induced by National  
739 Institutes of Health Monovalent Dengue Virus Vaccines. *J Infect Dis* **220**:219-227.
- 740 43. **Thomas, S. J., and I. K. Yoon.** 2019. A review of Dengvaxia(R): development to  
741 deployment. *Hum Vaccin Immunother*:1-20.

- 742 44. **Tian, Y., M. Babor, J. Lane, G. Seumois, S. Liang, N. D. S. Goonawardhana, A. D. De**  
743 **Silva, E. J. Phillips, S. A. Mallal, R. da Silva Antunes, A. Grifoni, P. Vijayanand, D.**  
744 **Weiskopf, B. Peters, and A. Sette.** 2019. Dengue-specific CD8+ T cell subsets display  
745 specialized transcriptomic and TCR profiles. *J Clin Invest* **130**:1727-1741.
- 746 45. **Tian, Y., A. Sette, and D. Weiskopf.** 2016. Cytotoxic CD4 T Cells: Differentiation,  
747 Function, and Application to Dengue Virus Infection. *Front Immunol* **7**:531.
- 748 46. **VanBlargan, L. A., S. Mukherjee, K. A. Dowd, A. P. Durbin, S. S. Whitehead, and T.**  
749 **C. Pierson.** 2013. The type-specific neutralizing antibody response elicited by a dengue  
750 vaccine candidate is focused on two amino acids of the envelope protein. *PLoS Pathog*  
751 **9**:e1003761.
- 752 47. **Vita, R., S. Mahajan, J. A. Overton, S. K. Dhanda, S. Martini, J. R. Cantrell, D. K.**  
753 **Wheeler, A. Sette, and B. Peters.** 2019. The Immune Epitope Database (IEDB): 2018  
754 update. *Nucleic Acids Res* **47**:D339-D343.
- 755 48. **Waickman, A. T., H. Friberg, M. Gargulak, A. Kong, M. Polhemus, T. Endy, S. J.**  
756 **Thomas, R. G. Jarman, and J. R. Currier.** 2019. Assessing the Diversity and Stability  
757 of Cellular Immunity Generated in Response to the Candidate Live-Attenuated Dengue  
758 Virus Vaccine TAK-003. *Front Immunol* **10**:1778.
- 759 49. **Weiskopf, D., M. A. Angelo, D. J. Bangs, J. Sidney, S. Paul, B. Peters, A. D. de Silva,**  
760 **J. C. Lindow, S. A. Diehl, S. Whitehead, A. Durbin, B. Kirkpatrick, and A. Sette.**  
761 2015. The human CD8+ T cell responses induced by a live attenuated tetravalent dengue  
762 vaccine are directed against highly conserved epitopes. *J Virol* **89**:120-128.
- 763 50. **Weiskopf, D., M. A. Angelo, E. L. de Azeredo, J. Sidney, J. A. Greenbaum, A. N.**  
764 **Fernando, A. Broadwater, R. V. Kolla, A. D. De Silva, A. M. de Silva, K. A. Mattia,**

- 765 **B. J. Doranz, H. M. Grey, S. Shrestha, B. Peters, and A. Sette.** 2013. Comprehensive  
766 analysis of dengue virus-specific responses supports an HLA-linked protective role for  
767 CD8+ T cells. *Proc Natl Acad Sci U S A* **110**:E2046-2053.
- 768 51. **Weiskopf, D., M. A. Angelo, A. Grifoni, P. H. O'Rourke, J. Sidney, S. Paul, A. D. De**  
769 **Silva, E. Phillips, S. Mallal, S. Premawansa, G. Premawansa, A. Wijewickrama, B.**  
770 **Peters, and A. Sette.** 2016. HLA-DRB1 Alleles Are Associated With Different  
771 Magnitudes of Dengue Virus-Specific CD4+ T-Cell Responses. *J Infect Dis* **214**:1117-  
772 1124.
- 773 52. **Weiskopf, D., M. A. Angelo, J. Sidney, B. Peters, S. Shrestha, and A. Sette.** 2014.  
774 Immunodominance changes as a function of the infecting dengue virus serotype and  
775 primary versus secondary infection. *J Virol* **88**:11383-11394.
- 776 53. **Weiskopf, D., D. J. Bangs, J. Sidney, R. V. Kolla, A. D. De Silva, A. M. de Silva, S.**  
777 **Crotty, B. Peters, and A. Sette.** 2015. Dengue virus infection elicits highly polarized  
778 CX3CR1+ cytotoxic CD4+ T cells associated with protective immunity. *Proc Natl Acad*  
779 *Sci U S A* **112**:E4256-4263.
- 780 54. **Weiskopf, D., C. Cerpas, M. A. Angelo, D. J. Bangs, J. Sidney, S. Paul, B. Peters, F.**  
781 **P. Sanches, C. G. Silvera, P. R. Costa, E. G. Kallas, L. Gresh, A. Balmaseda, E. Harris,**  
782 **and A. Sette.** 2015. Human CD8+ T cell responses against the four dengue virus serotypes  
783 are associated with distinct patterns of protein targets. *The Journal of infectious diseases*.
- 784 55. **Weiskopf, D., C. Cerpas, M. A. Angelo, D. J. Bangs, J. Sidney, S. Paul, B. Peters, F.**  
785 **P. Sanches, C. G. Silvera, P. R. Costa, E. G. Kallas, L. Gresh, A. D. de Silva, A.**  
786 **Balmaseda, E. Harris, and A. Sette.** 2015. Human CD8+ T-Cell Responses Against the

- 787 4 Dengue Virus Serotypes Are Associated With Distinct Patterns of Protein Targets. *J*  
788 *Infect Dis* **212**:1743-1751.
- 789 56. **Weiskopf, D., and A. Sette.** 2014. T-cell immunity to infection with dengue virus in  
790 humans. *Front Immunol* **5**:93.
- 791 57. **Weiskopf, D., L. E. Yauch, M. A. Angelo, D. V. John, J. A. Greenbaum, J. Sidney, R.**  
792 **V. Kolla, A. D. De Silva, A. M. de Silva, H. Grey, B. Peters, S. Shrestha, and A. Sette.**  
793 2011. Insights into HLA-restricted T cell responses in a novel mouse model of dengue  
794 virus infection point toward new implications for vaccine design. *J Immunol* **187**:4268-  
795 4279.
- 796 58. **Wen, J., W. W. Tang, N. Sheets, J. Ellison, A. Sette, K. Kim, and S. Shrestha.** 2017.  
797 Identification of Zika virus epitopes reveals immunodominant and protective roles for  
798 dengue virus cross-reactive CD8(+) T cells. *Nature microbiology* **2**:17036.
- 799 59. **Wen, J., W. W. Tang, N. Sheets, J. Ellison, A. Sette, K. Kim, and S. Shrestha.** 2017.  
800 Identification of Zika virus epitopes reveals immunodominant and protective roles for  
801 dengue virus cross-reactive CD8+ T cells. *Nature microbiology* **2**:17036.
- 802 60. **Whitehead, S. S.** 2016. Development of TV003/TV005, a single dose, highly  
803 immunogenic live attenuated dengue vaccine; what makes this vaccine different from the  
804 Sanofi-Pasteur CYD vaccine? *Expert Rev Vaccines* **15**:509-517.
- 805 61. **Whitehead, S. S., A. P. Durbin, K. K. Pierce, D. Elwood, B. D. McElvany, E. A. Fraser,**  
806 **M. P. Carmolli, C. M. Tibery, N. A. Hynes, M. Jo, J. M. Lovchik, C. J. Larsson, E. A.**  
807 **Doty, D. M. Dickson, C. J. Luke, K. Subbarao, S. A. Diehl, and B. D. Kirkpatrick.**  
808 2017. In a randomized trial, the live attenuated tetravalent dengue vaccine TV003 is well-

- 809 tolerated and highly immunogenic in subjects with flavivirus exposure prior to vaccination.  
810 PLoS Negl Trop Dis **11**:e0005584.
- 811 62. **Xu, X., K. Vaughan, D. Weiskopf, A. Grifoni, M. S. Diamond, A. Sette, and B. Peters.**  
812 2016. Identifying Candidate Targets of Immune Responses in Zika Virus Based on  
813 Homology to Epitopes in Other Flavivirus Species. PLoS currents **8**.
- 814 63. **Yauch, L. E., T. R. Prestwood, M. M. May, M. M. Morar, R. M. Zellweger, B. Peters,**  
815 **A. Sette, and S. Shresta.** 2010. CD4+ T cells are not required for the induction of dengue  
816 virus-specific CD8+ T cell or antibody responses but contribute to protection after  
817 vaccination. J Immunol **185**:5405-5416.
- 818 64. **Yauch, L. E., R. M. Zellweger, M. F. Kotturi, A. Qutubuddin, J. Sidney, B. Peters, T.**  
819 **R. Prestwood, A. Sette, and S. Shresta.** 2009. A protective role for dengue virus-specific  
820 CD8+ T cells. J Immunol **182**:4865-4873.  
821

822 **Figure Legend**

823

824 **FIG 1. CD8 reactivity against flavivirus MP in flavivirus endemic areas.** Percent of  
825 CD3+CD8+ IFN $\gamma$ -producing T cells after flavivirus MP stimulation for 6 hours PBMCs derived  
826 from Blood Bank donors in Nicaragua (n=8) and Sri Lanka (n=6). Statistical analyses have been  
827 performed using paired non-parametric Wilcoxon test. \*\*p < 0.01, \*\*\*p < 0.001, \*\*\*\*p < 0.0001,  
828 ns not significant.

829

830 **FIG 2. CD8 reactivity against flavivirus MP in vaccination.** Percent of CD3+CD8+ IFN $\gamma$ -  
831 producing T cells after flavivirus MP stimulation for 6 hours. A) Reactivity of TV005 vaccinees  
832 (n=14) compared to flavivirus naïve (n=10). B) Reactivity of YF17D vaccinees (n= 15) compared  
833 to the same flavivirus naïve cohort. Data are expressed as Geometric Mean with 95% CI. Statistical  
834 analyses between the different cohorts have been performed using unpaired non-parametric Mann-  
835 Whitney test, while statistical analyses for the same cohort across stimuli have been performed  
836 using paired non-parametric Wilcoxon test. \*\*p < 0.01, \*\*\*p < 0.001, \*\*\*\*p < 0.0001, ns not  
837 significant. White circles represent flavivirus naïve, Black squares represent TV005 vaccinees and  
838 black triangles represent YF17D vaccinees.

839

840 **FIG 3. Activation marker expression in IFN $\gamma$ -producing T CD8 cells after flavivirus specific**  
841 **MP stimulation or cross-reactive flavivirus MP stimulation.** Expression of CD69, CD137 and  
842 CD40L (for gating strategy see **Fig 8**) was assessed for individual donor/MP stimulation  
843 combinations. Only instances associated with positive responses were examined (defined as % of  
844 CD3+CD8+ IFN $\gamma$ + above the 0.03 threshold calculated based on mean+2SD of flavivirus naïve



845 MP reactivity). Expression of these markers in the CD3+CD8+ IFN $\gamma$ + subset is compared with  
846 bulk CD3+CD8+ T cell (white symbols) after stimulation with homologous MP (black symbols)  
847 or heterologous MPs (all different heterologous MPs combined; grey symbols). Responses in  
848 TV005 vaccinees (A; squares, n=14) or YF17D vaccinees (B; triangles, n=15) are shown. Data  
849 are expressed as Median with 95%CI. Statistical analyses have been performed using unpaired  
850 non-parametric Mann-Whitney test. \*p<0.05, \*\*p < 0.01, \*\*\*p < 0.001, \*\*\*\*p < 0.0001, ns not  
851 significant.

852

853 **FIG 4. Relative potency of homologous and heterologous flavivirus peptides for CD8+ T cells**

854 **derived from monovalent DENV vaccination.** Spot Forming Cells per million (SFC/10<sup>6</sup>)

855 CD8s are plotted for six TCLs stimulated with each peptide at six concentration after 14 days in-

856 vitro expansion and derived from four DENV monovalent vaccinees. Specific peptide responses

857 from vaccinees are shown in A-D (DEN3 $\Delta$ 30,31) and E-F (DEN1 $\Delta$ 30,31); B and C represent

858 independent TCL specific for the same epitopes but derived from two different donors,

859 respectively. G) Summary of the patterns of the relative potency of heterologous peptides

860 compared to the homologous immunizing sequence. Relative potency was calculated for each

861 homologous/heterologous peptide combination based on observed dose responses by recording

862 which peptide dose would give equivalent SFC/10<sup>6</sup> values. The number of instances where the

863 heterologous sequences were associated with a relative potency of 1-10 (high), 10.1-100

864 (intermediate), >100.1-1000 (weak), 1000.1-10000 (very weak) and >10000 or negative is shown.

865

866 **FIG 5. Relative potency of homologous and heterologous flavivirus peptides for CD8+ T cells**

867 **derived from YF17D vaccination.** A-H) Spot Forming Cells per million (SFC/10<sup>6</sup>) CD8s are

868 plotted for TCLs stimulated with each peptide at six concentrations after 14 days in-vitro  
869 expansion derived from six YF17D vaccinees. I) Summary of the patterns of the relative potency  
870 of heterologous peptides compared to the homologous immunizing sequence. Relative potency  
871 was calculated for each homologous/heterologous peptide combination based on observed dose  
872 responses by recording which peptide dose would give equivalent SFC/10<sup>6</sup> values. The number of  
873 instances where the heterologous sequences were associated with a relative potency of 1-10  
874 (high), 10.1-100 (intermediate), >101-1000 (weak), 1001-10000 (very weak) and >10000 or  
875 negative is shown.

876

877 **FIG 6. Relative potency of homologous and heterologous flavivirus peptides for CD4+ T cells**  
878 **derived from monovalent DENV vaccination.** Spot Forming Cells per million (SFC/10<sup>6</sup>)  
879 CD4s are plotted for seven TCLs stimulated with each peptide at six concentrations after 14 days  
880 in-vitro expansion and derived from six DENV monovalent vaccinees. Specific peptide responses  
881 from vaccinees are shown in A (DEN1Δ30,31) and B-F (DEN3Δ30,31); A, B and E, F represent  
882 independent TCL specific for the same epitopes but derived from two different donors,  
883 respectively. G) Summary of the patterns of the relative potency of heterologous peptides  
884 compared to the homologous immunizing sequence. Relative potency was calculated for each  
885 homologous/heterologous peptide combination based on observed dose responses by recording  
886 which peptide dose would give equivalent SFC/10<sup>6</sup> values. The number of instances where the  
887 heterologous sequences were associated with a relative potency of 1-10 (high), 10.1-100  
888 (intermediate), >101-1000 (weak), 1001-10000 (very weak) and >10000 or negative is shown.

889 **FIG 7. Relative potency of homologous and heterologous flavivirus peptides for CD4+ T cells**  
890 **derived from YF17D vaccination.** A-I) Spot Forming Cells per million (SFC/10<sup>6</sup>) CD4s are  
891 plotted for TCLs stimulated with each peptide at six concentrations after 14 days in-vitro  
892 expansion derived from nine YF17D vaccinees. Specific peptide responses from YF17D vaccinees  
893 are shown. J) Summary of the patterns of the relative potency of heterologous peptides compared  
894 to the homologous immunizing sequence. Relative potency was calculated for each  
895 homologous/heterologous peptide combination based on observed dose responses by recording  
896 which peptide dose would give equivalent SFC/10<sup>6</sup> values. The number of instances where the  
897 heterologous sequences were associated with a relative potency of 1-10 (high), 10.1-100  
898 (intermediate), >101-1000 (weak), 1001-10000 (very weak) and >10000 or negative is shown.

899  
900 **FIG 8. Gating strategy.** To examine IFN $\gamma$  production in CD8+ T Cells, lymphocytes were gated  
901 from the whole PBMC on FSC-A and SSC-A axes, followed by exclusion of outlying data points  
902 on FSC-W and SSC-W parameters. Cells positive for viability stain, as well as those found to be  
903 CD3- were excluded. Of those remaining, cells were separated based on CD4 and CD8 expression  
904 parameters and CD8 were exclusively investigated. Intracellular expression levels of T cell  
905 activation markers CD69, CD137, and CD40L were examined in whole CD8, “Bulk”, and  
906 CD8+IFN $\gamma$ + cells. Samples were acquired on an LSRII (BD Biosciences, San Diego, CA).  
907

908 **TABLE 1.** Source Proteins of peptides contained in the flaviviruses MPs.

|                    |             | <b>Number of peptides from each viral protein category</b> |               |                       |              |
|--------------------|-------------|------------------------------------------------------------|---------------|-----------------------|--------------|
|                    |             | <i>prM and Envelope</i>                                    | <i>Capsid</i> | <i>Non-Structural</i> | <i>Total</i> |
| <b>CD8<br/>MPs</b> | <i>DENV</i> | 49                                                         | 14            | 205                   | 268          |
|                    | <i>ZIKV</i> | 52                                                         | 10            | 247                   | 309          |
|                    | <i>YFV</i>  | 70                                                         | 11            | 287                   | 368          |
|                    | <i>JEV</i>  | 50                                                         | 10            | 250                   | 310          |
|                    | <i>WNV</i>  | 60                                                         | 13            | 251                   | 324          |

909

910 **TABLE 2.** Sequence identity of CD8 flaviviruses MPs and consensus sequences of indicated  
911 flaviviruses. The percent of sequence identity in each DENV serotype (DENV1, -2, -3 and -4) was  
912 calculated independently and the maximum value was assigned to represent the DENV sequence  
913 identity.

|                    |             | <b>Number of peptides with <math>\geq 70\%</math> sequence identity to consensus sequences</b> |             |            |            |            |              |             |            |
|--------------------|-------------|------------------------------------------------------------------------------------------------|-------------|------------|------------|------------|--------------|-------------|------------|
|                    |             | <i>DENV</i>                                                                                    | <i>ZIKV</i> | <i>YFV</i> | <i>JEV</i> | <i>WNV</i> | <i>CHIKV</i> | <i>EBOV</i> | <i>HCV</i> |
| <b>CD8<br/>MPs</b> | <i>DENV</i> | 83                                                                                             | 33          | 16         | 25         | 26         | 0            | 0           | 0          |
|                    | <i>ZIKV</i> | 30                                                                                             | 100         | 16         | 35         | 33         | 0            | 0           | 0          |
|                    | <i>YFV</i>  | 17                                                                                             | 16          | 100        | 15         | 17         | 0            | 0           | 0          |
|                    | <i>JEV</i>  | 26                                                                                             | 30          | 16         | 100        | 69         | 0            | 0           | 0          |
|                    | <i>WNV</i>  | 28                                                                                             | 33          | 16         | 71         | 100        | 0            | 0           | 0          |

914

915 **TABLE 3.** List of cutoff used per HLA class I based on previous DENV studies.

| <b>HLA</b>         | <b>Percentile cutoff</b> |
|--------------------|--------------------------|
| <i>A*01:01</i>     | 0.75                     |
| <i>A*02:01</i>     | 0.4                      |
| <i>A*02:06</i>     | 1.05                     |
| <i>A*03:01</i>     | 0.35                     |
| <i>A*23:01</i>     | 1.1                      |
| <i>A*24:02</i>     | 1                        |
| <i>A*26:01</i>     | 0.15                     |
| <i>A*31:01</i>     | 0.85                     |
| <i>A*33:01</i>     | 0.85                     |
| <i>A*68:01</i>     | 0.45                     |
| <i>A*68:02</i>     | 1.5                      |
| <i>B*07:02</i>     | 0.35                     |
| <i>B*15:01</i>     | 0.7                      |
| <i>B*35:01</i>     | 1                        |
| <i>B*40:01</i>     | 0.25                     |
| <i>B*44:02</i>     | 0.4                      |
| <i>B*44:03</i>     | 0.4                      |
| <i>B*51:01</i>     | 0.6                      |
| <i>B*53:01</i>     | 0.7                      |
| <i>B*57:01</i>     | 0.25                     |
| <i>B*58:01</i>     | 0.3                      |
| <i>Unknown HLA</i> | 0.6                      |

916

917

918 **TABLE 4.** Antibody panel used in flow cytometry experiments to identify both magnitude and  
 919 quality of CD8+ T Cell response and relevant subpopulations.

920

| <b>Antibody</b> | <b>Fluorochrome</b> | <b>Volume (mL)/test</b> | <b>Vendor</b>  | <b>Catalog</b> | <b>Clone</b> |
|-----------------|---------------------|-------------------------|----------------|----------------|--------------|
| CD4             | APC ef 780          | 1                       | eBioscience    | 47-0049-42     | RPA-T4       |
| CD3             | AF700               | 2                       | Biolegend      | 317340         | OKT3         |
| CD8             | BV650               | 2                       | BioLegend      | 301042         | RPA-T8       |
| CD14            | V500                | 2                       | BD Biosciences | 561391         | M5E2         |
| CD19            | V500                | 2                       | BD Biosciences | 561121         | HIB19        |
| Fixability Dye  | ef506               | 1ul/mL of master mix    | eBioscience    | 65-0866-18     | N/A          |
| IFNg            | FITC                | 1                       | eBioscience    | 11-7319-82     | 4S.B3        |
| CD154 (CD40L)   | PE                  | 2                       | eBioscience    | 12-1548-42     | 24-31        |
| CD69            | PE Cy7              | 2                       | eBioscience    | 25-0699-42     | FN50         |
| CD137(4-1BB)    | APC                 | 2                       | BioLegend      | 309810         | 4B4-1        |

921

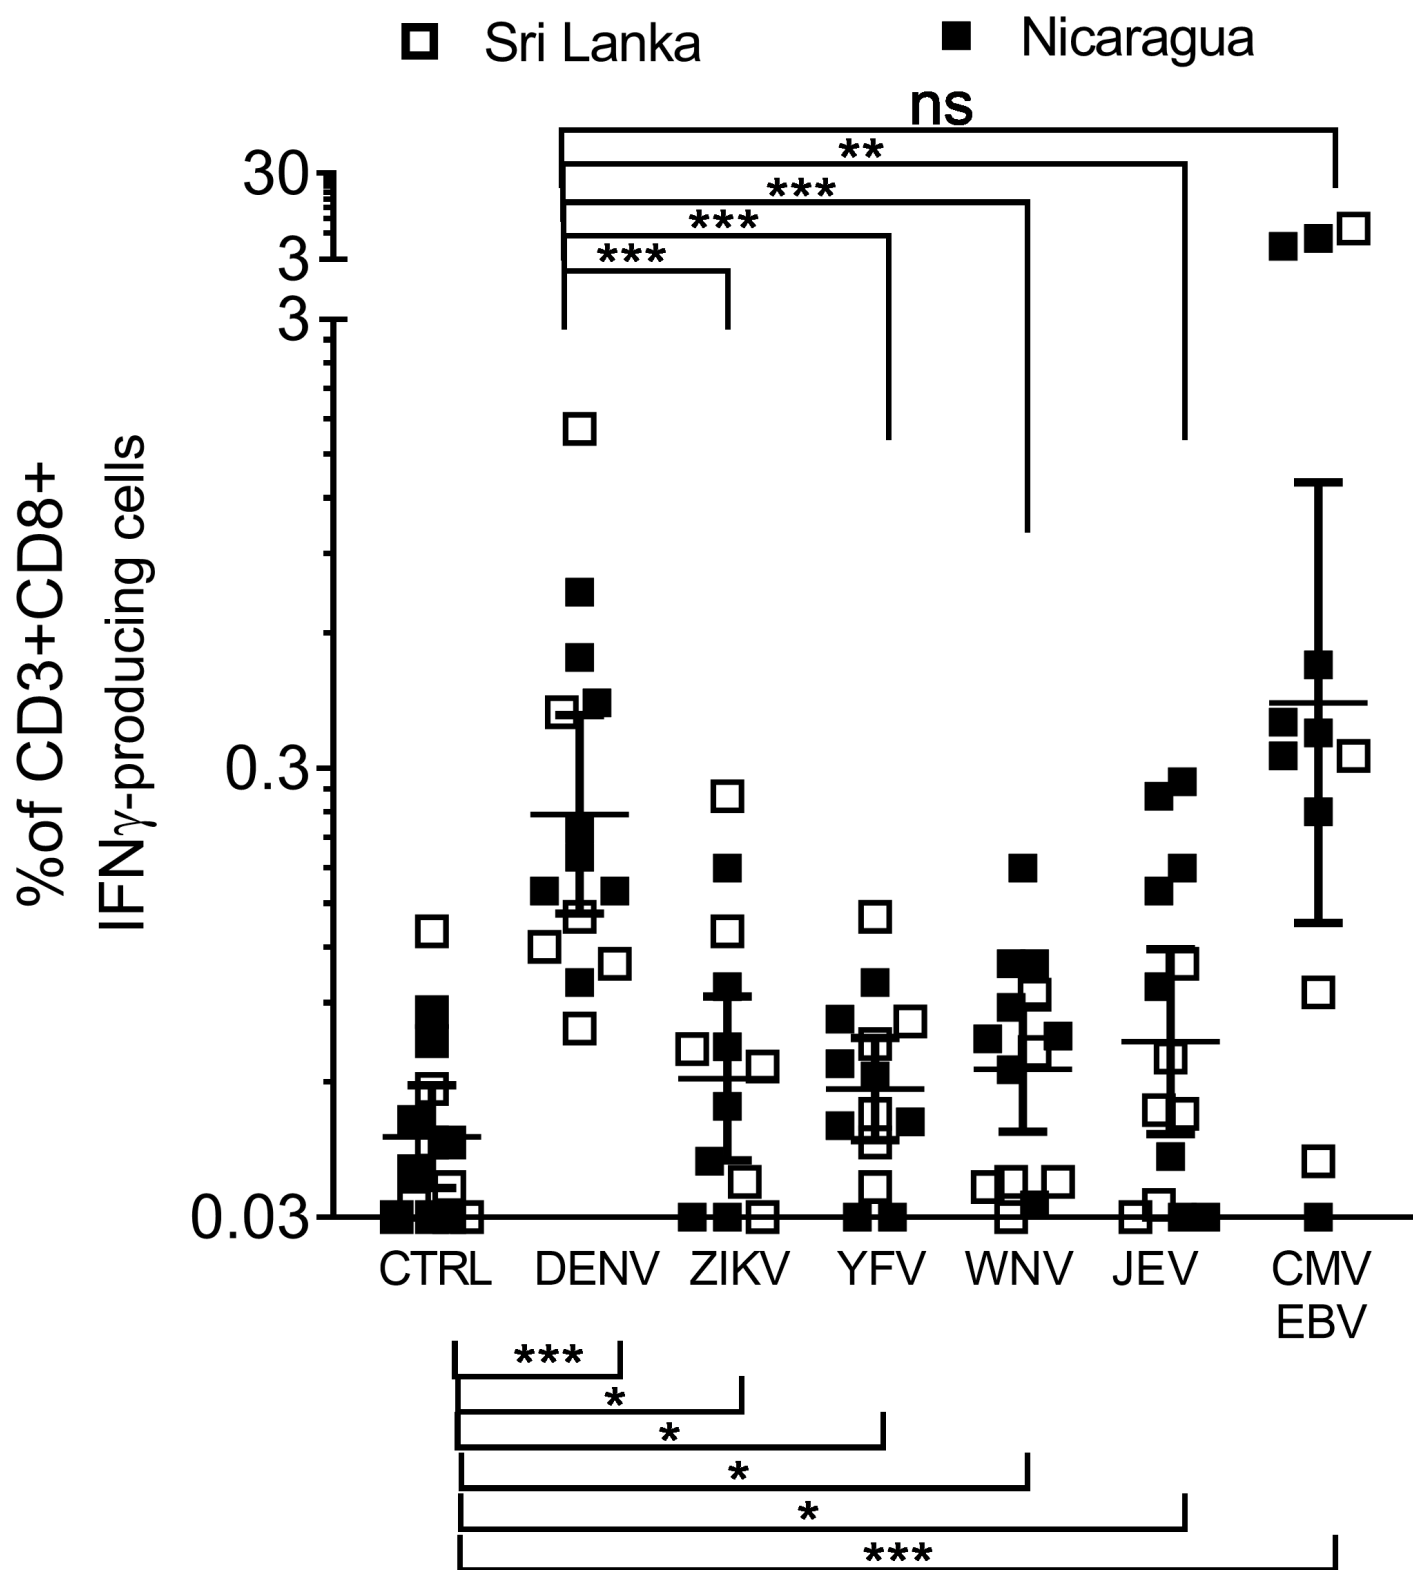



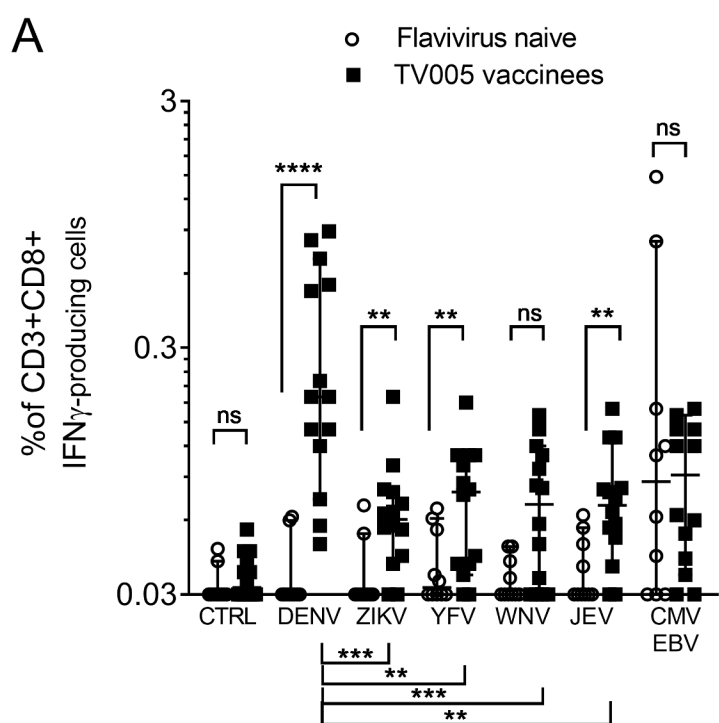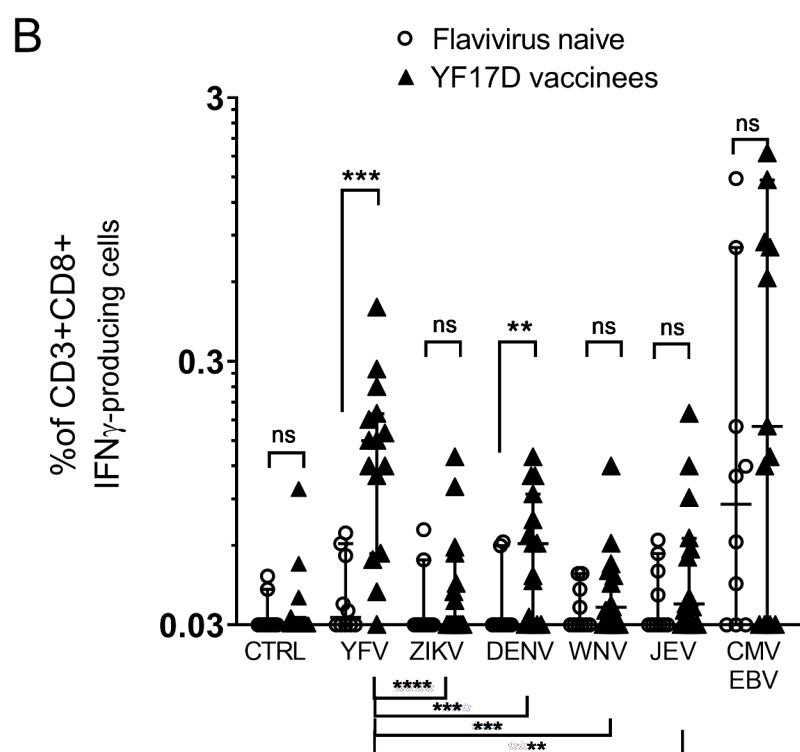

A

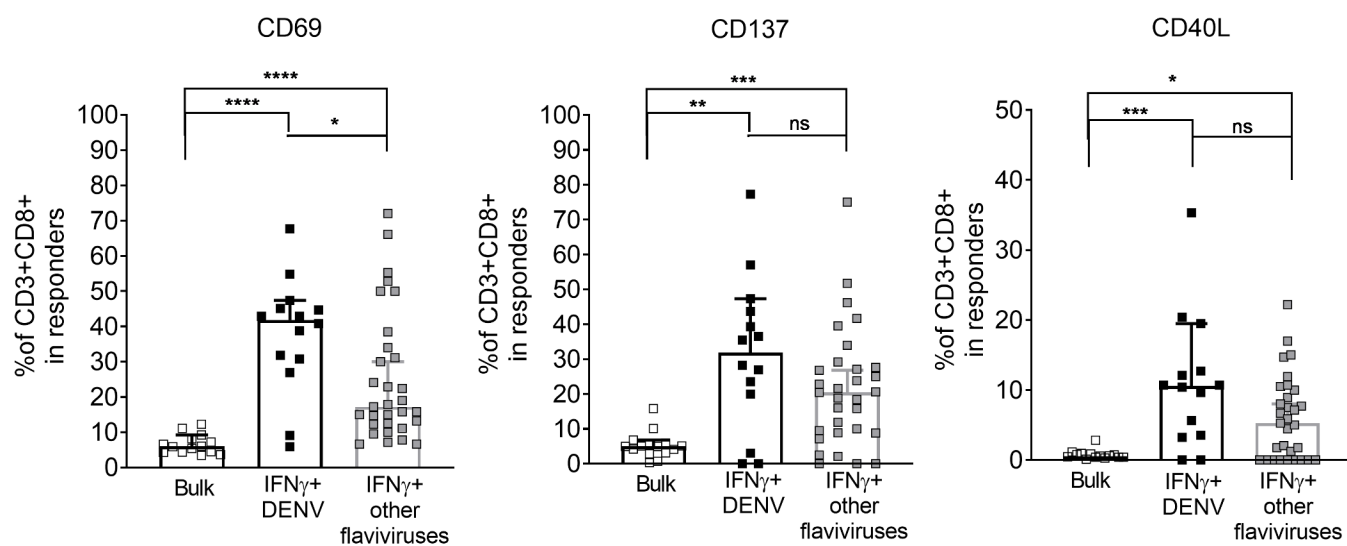

B

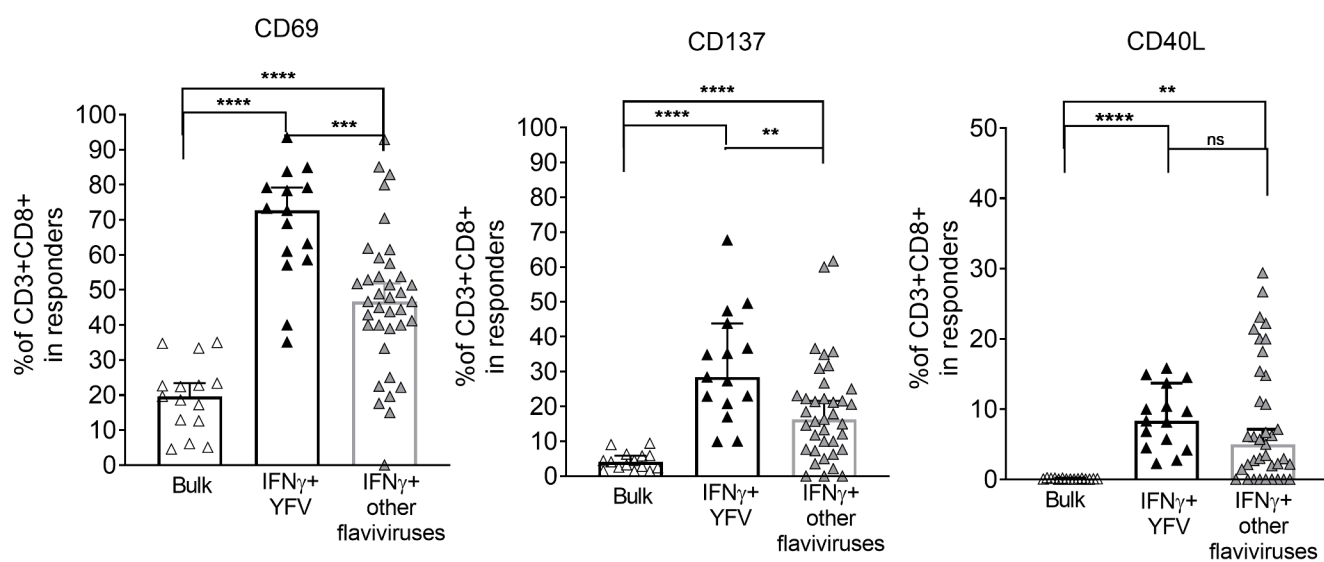

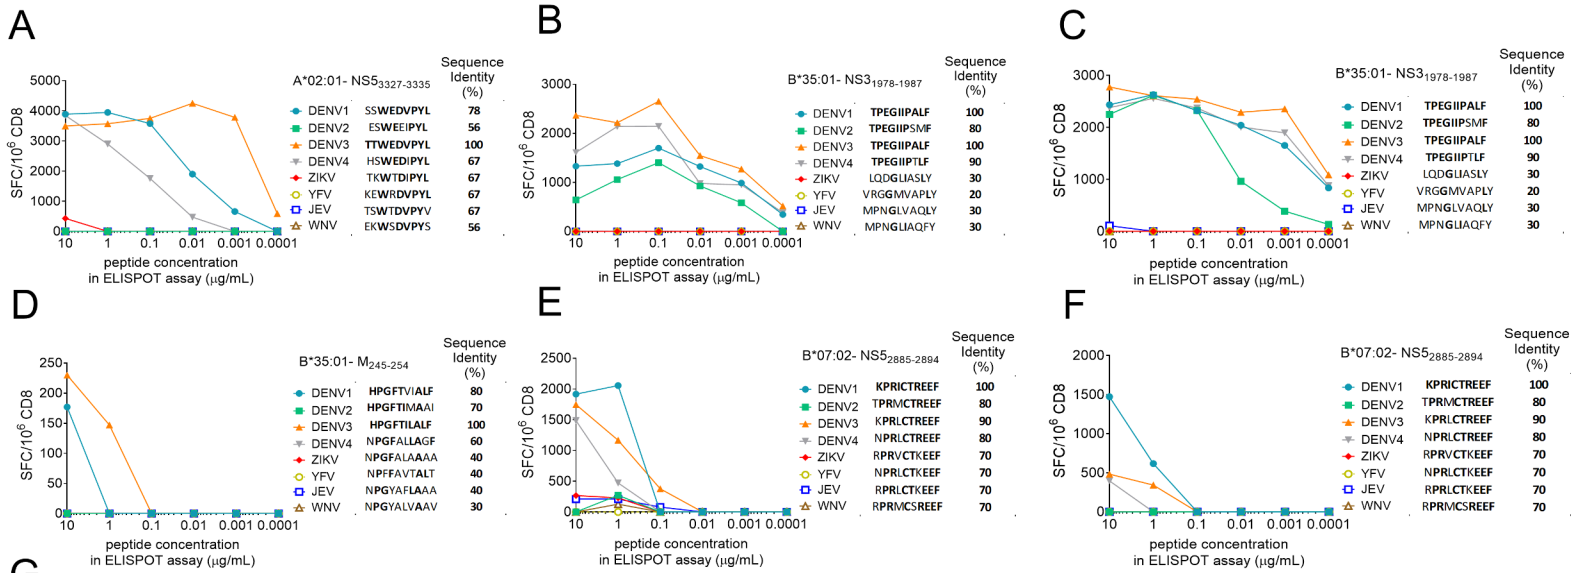

**G**

| Fold Change | 1-10 | 10.1-100 | 101-1000 | 1001-10000 | >10000 or negative |
|-------------|------|----------|----------|------------|--------------------|
| DENV 1      | 4    | 0        | 0        | 0          | 0                  |
| DENV 2      | 1    | 0        | 1        | 1          | 3                  |
| DENV 3      | 0    | 0        | 1        | 1          | 0                  |
| DENV 4      | 2    | 0        | 2        | 1          | 1                  |
| ZIKV        | 0    | 0        | 0        | 2          | 4                  |
| YFV         | 0    | 0        | 0        | 0          | 6                  |
| JEV         | 0    | 0        | 0        | 1          | 5                  |
| WNV         | 0    | 0        | 0        | 1          | 5                  |

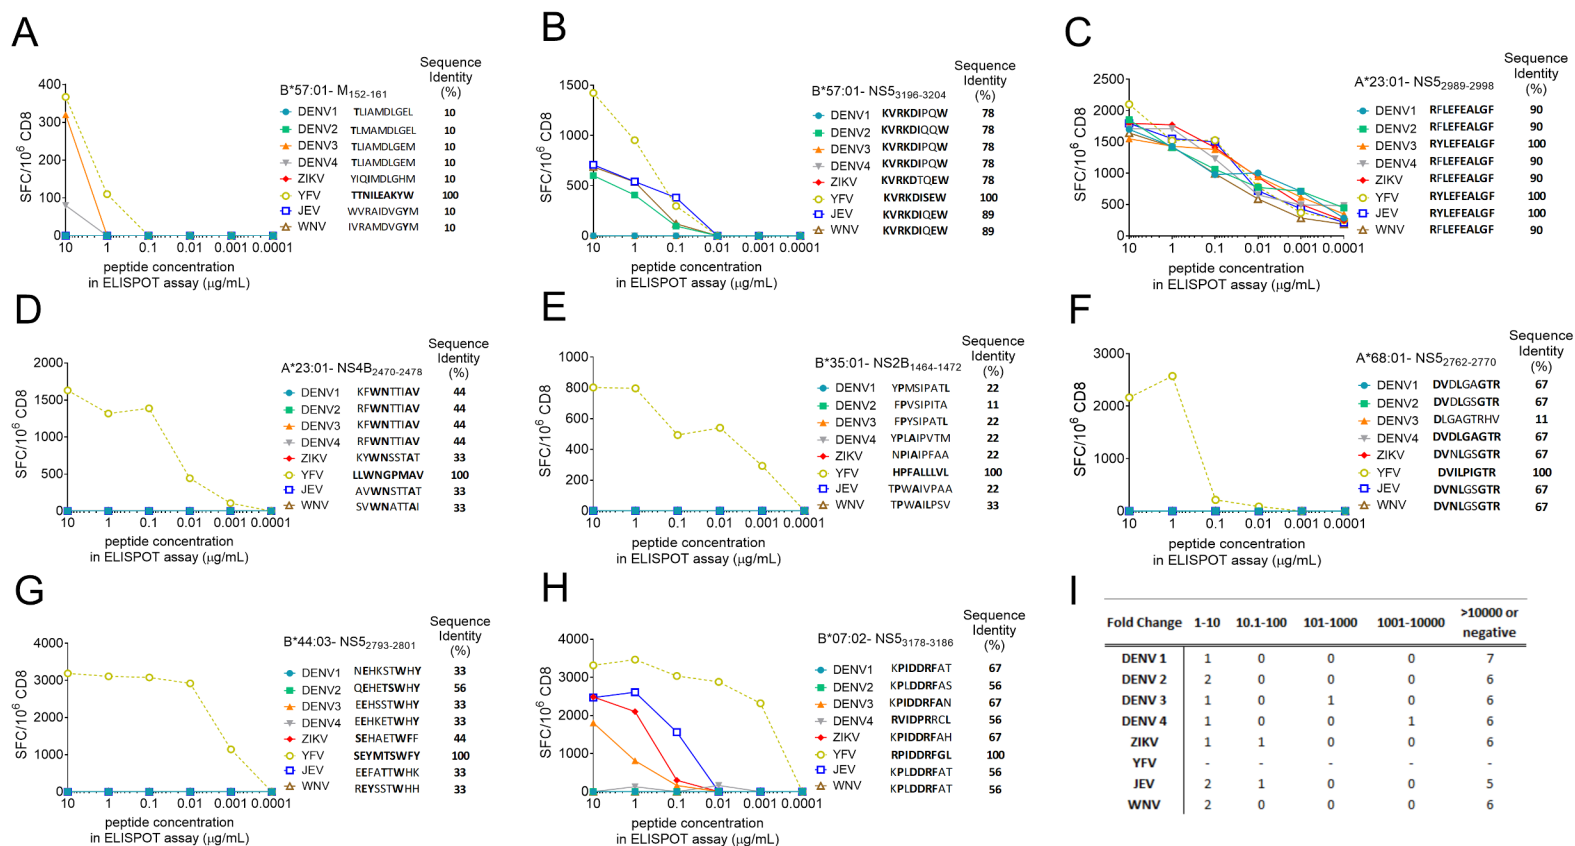

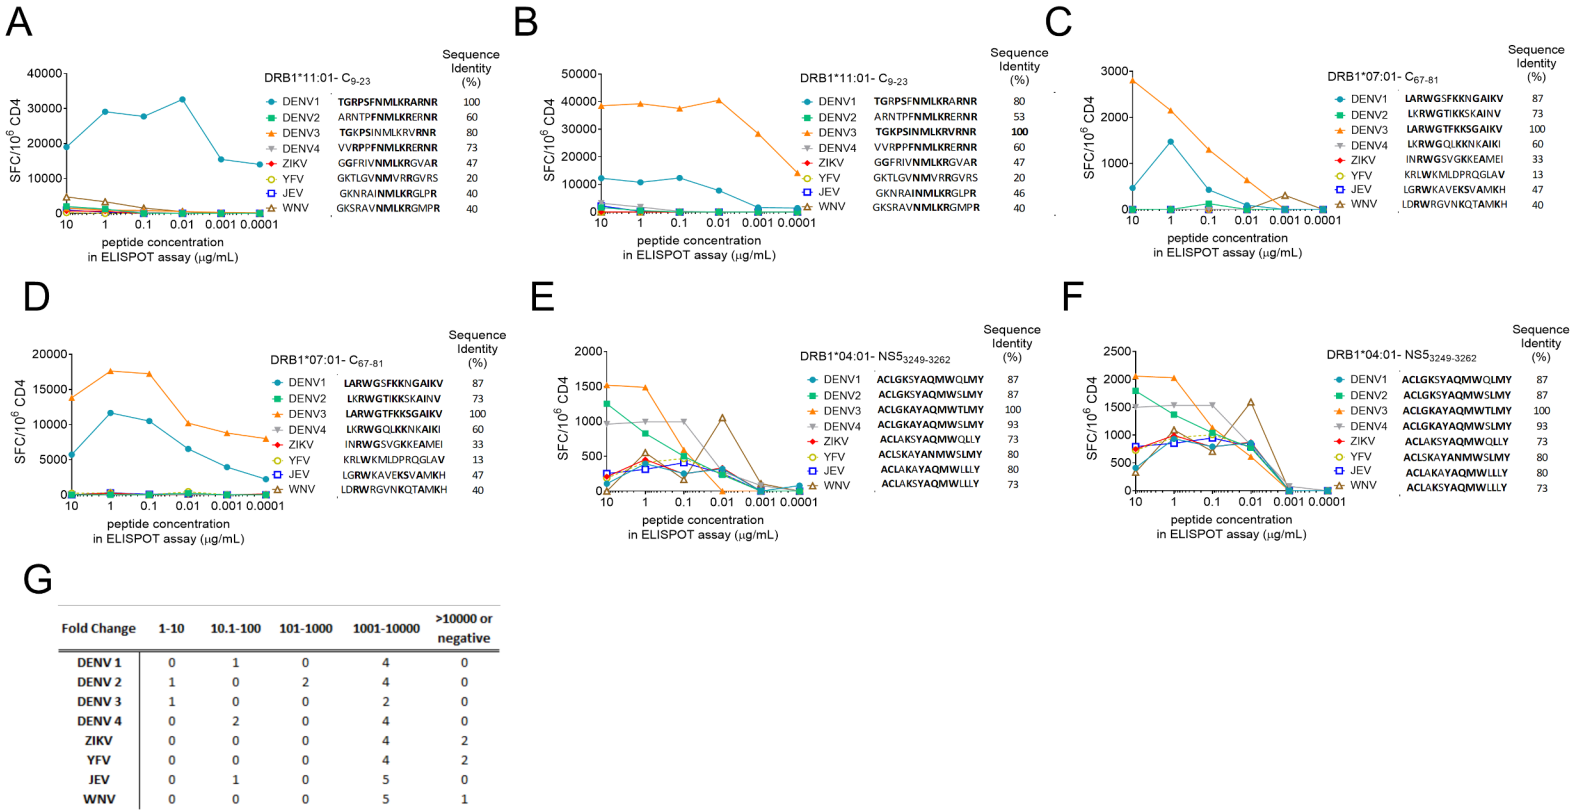

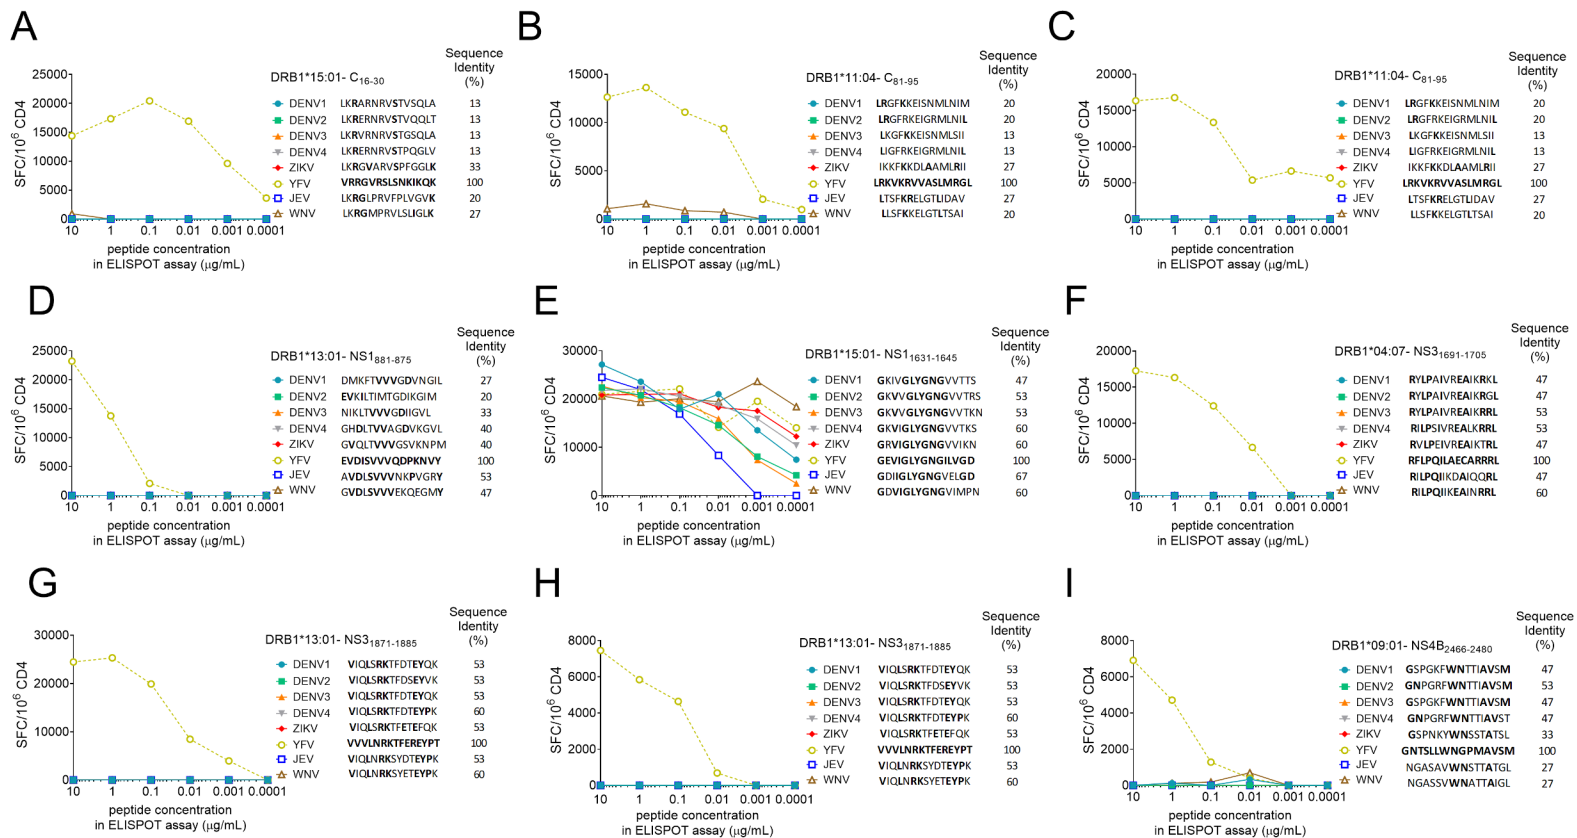

**J**

| Fold Change | 1-10 | 10.1-100 | 101-1000 | 1001-10000 | >10000 or negative |
|-------------|------|----------|----------|------------|--------------------|
| DENV 1      | 1    | 0        | 0        | 0          | 9                  |
| DENV 2      | 1    | 0        | 0        | 0          | 9                  |
| DENV 3      | 1    | 0        | 0        | 0          | 9                  |
| DENV 4      | 1    | 0        | 0        | 0          | 9                  |
| ZIKV        | 1    | 0        | 0        | 0          | 9                  |
| YFV         | -    | -        | -        | -          | -                  |
| JEV         | 1    | 0        | 0        | 0          | 9                  |
| WNV         | 1    | 0        | 0        | 3          | 5                  |

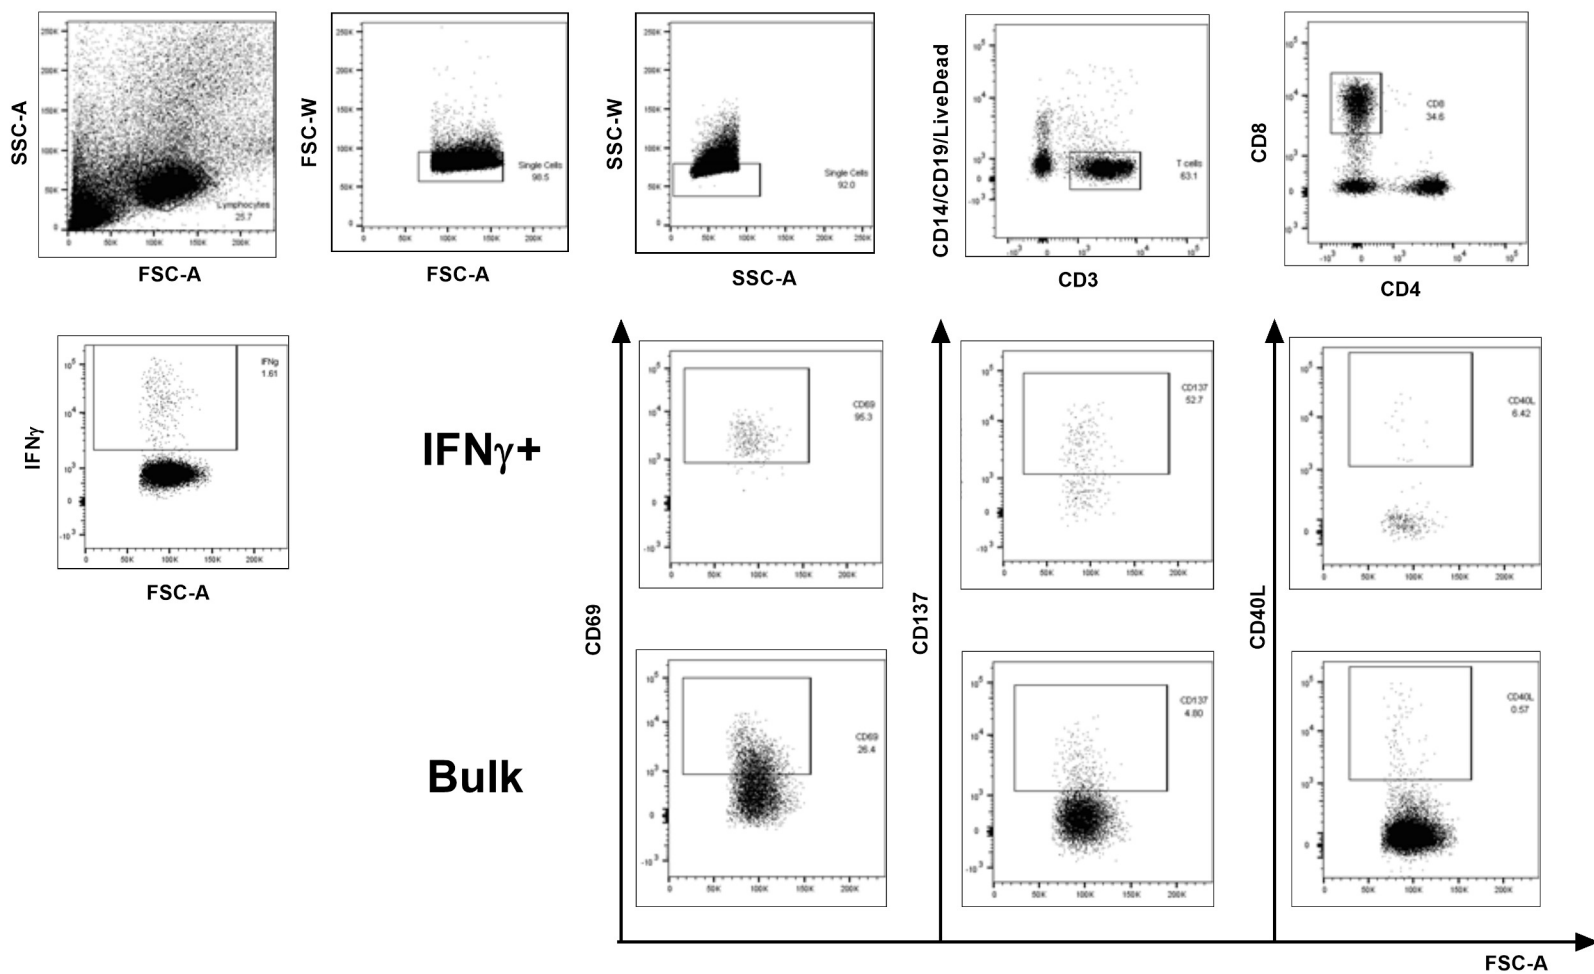

Source: https://www.biorxiv.org/content/10.1101/2020.01.17.911099v1.full.pdf
